# Supplementary material for: Automated digital technologies for supporting sepsis prediction in children: a scoping review protocol
Source: PubMed Central journal article supplement — BMJ Open. 2022 Nov 22;12(11):e065429. doi: 10.1136/bmjopen-2022-065429 (PMC9685233; doi:10.1136/bmjopen-2022-065429), 2022-11-22
Supplement: bmjopen-2022-065429.draft_revisions.pdf [file bmjopen-2022-065429.draft_revisions.pdf]

# BMJ Open

BMJ Open is committed to open peer review. As part of this commitment we make the peer review history of every article we publish publicly available.

When an article is published we post the peer reviewers' comments and the authors' responses online. We also post the versions of the paper that were used during peer review. These are the versions that the peer review comments apply to.

The versions of the paper that follow are the versions that were submitted during the peer review process. They are not the versions of record or the final published versions. They should not be cited or distributed as the published version of this manuscript.

BMJ Open is an open access journal and the full, final, typeset and author-corrected version of record of the manuscript is available on our site with no access controls, subscription charges or pay-per-view fees (<http://bmjopen.bmj.com>).

If you have any questions on BMJ Open's open peer review process please email [info.bmjopen@bmj.com](mailto:info.bmjopen@bmj.com)

# BMJ Open

## Digital technologies for sepsis prediction in children: A scoping review protocol

|                               |                                                                                                                                                                                                                                                                                                                                                                                                                                                                                                                                             |
|-------------------------------|---------------------------------------------------------------------------------------------------------------------------------------------------------------------------------------------------------------------------------------------------------------------------------------------------------------------------------------------------------------------------------------------------------------------------------------------------------------------------------------------------------------------------------------------|
| Journal:                      | <i>BMJ Open</i>                                                                                                                                                                                                                                                                                                                                                                                                                                                                                                                             |
| Manuscript ID                 | bmjopen-2022-065429                                                                                                                                                                                                                                                                                                                                                                                                                                                                                                                         |
| Article Type:                 | Protocol                                                                                                                                                                                                                                                                                                                                                                                                                                                                                                                                    |
| Date Submitted by the Author: | 03-Jun-2022                                                                                                                                                                                                                                                                                                                                                                                                                                                                                                                                 |
| Complete List of Authors:     | Tennant, Ryan; University of Waterloo Faculty of Engineering, Department of Systems Design Engineering<br>Graham, Jennifer; University of Waterloo Faculty of Arts, Department of Psychology<br>Mercer, Kate; University of Waterloo Faculty of Engineering, Department of Systems Design Engineering; University of Waterloo, Library<br>Ansermino, J. Mark; The University of British Columbia, Department of Anesthesiology<br>Burns, Catherine; University of Waterloo Faculty of Engineering, Department of Systems Design Engineering |
| Keywords:                     | PAEDIATRICS, Health informatics < BIOTECHNOLOGY & BIOINFORMATICS, Information technology < BIOTECHNOLOGY & BIOINFORMATICS, Paediatric intensive & critical care < PAEDIATRICS                                                                                                                                                                                                                                                                                                                                                               |
|                               |                                                                                                                                                                                                                                                                                                                                                                                                                                                                                                                                             |

SCHOLARONE™  
Manuscripts

1  
2  
3 **1 Digital technologies for sepsis prediction in children: A scoping review protocol**  
4  
5 2

6  
7 **3 Ryan Tennant, BAsC., MAsC. (corresponding author)**

8 4 Department of Systems Design Engineering, Faculty of Engineering, University of Waterloo  
9  
10 5 200 University Avenue West, Waterloo, Ontario, Canada, N2L3G1  
11  
12 6 email: drtennan@uwaterloo.ca  
13

14 7  
15 **8 Jennifer Graham**

16  
17 9 Department of Psychology, University of Waterloo  
18  
19 10 200 University Avenue West, Waterloo, Ontario, Canada, N2L3G1  
20  
21 11 email: j38graham@uwaterloo.ca  
22

23  
24 **13 Kate Mercer, Ph.D.**

25 14 Library, University of Waterloo  
26  
27 15 Department of Systems Design Engineering, Faculty of Engineering, University of Waterloo  
28  
29 16 200 University Avenue West, Waterloo, Ontario, Canada, N2L3G1  
30  
31 17 email: kmercer@uwaterloo.ca  
32

33 18  
34 **19 J Mark Ansermino, MBBCh.**

35 20 Centre for International Child Health, BC Children's Hospital  
36  
37 21 Department of Anesthesiology, The University of British Columbia  
38  
39 22 950 West 28<sup>th</sup> Avenue, Vancouver, British Columbia, Canada, V5Z4H4  
40  
41 23 email: mansermino@bcchr.ca  
42

43 24  
44 **25 Catherine M Burns, Ph.D., PEng.**

45 26 Department of Systems Design Engineering, Faculty of Engineering, University of Waterloo  
46  
47 27 200 University Avenue West, Waterloo, Ontario, Canada, N2L3G1  
48  
49 28 email: c4burns@uwaterloo.ca  
50

51 29  
52  
53 **30 Word Count: 3333**  
54  
55  
56  
57  
58

1  
2  
3 **31 ABSTRACT**  
4

5 **32 Introduction** While there have been several literature reviews on the performance of digital  
6  
7  
8 **33** sepsis prediction technologies and clinical decision-support algorithms for adults, there remains a  
9  
10 **34** knowledge gap examining the development of technologies for sepsis prediction in children for  
11  
12 **35** supporting paediatric healthcare. This scoping review will critically analyze the current evidence  
13  
14 **36** investigating the design, validation, and implementation of digital technologies to predict  
15  
16 **37** paediatric sepsis to advance the development of new technologies for predicting sepsis in clinical  
17  
18 **38** settings.  
19  
20  
21

22 **39**  
23  
24 **40 Methods and analysis** This scoping review will follow Arksey and O'Malley's framework. We  
25  
26 **41** will further develop the protocol using the Preferred Reporting Items for Systematic Review and  
27  
28 **42** Meta-Analysis extension for scoping reviews (PRISMA-ScR). We plan to search the following  
29  
30 **43** databases: Association of Computing Machinery (ACM) Digital Library, Cumulative Index to  
31  
32 **44** Nursing and Allied Health Literature (CINAHL), Embase, Google Scholar, Institute of Electric  
33  
34 **45** and Electronic Engineers (IEEE), PubMed, Scopus, and Web of Science. Studies will be  
35  
36 **46** included on children >90 days post-natal to <21 years old, predicted to have or be at risk of  
37  
38 **47** developing sepsis by a digitalized model or algorithm designed for a clinical setting. Two  
39  
40 **48** independent reviewers will complete the abstract and full-text screening and the data extraction.  
41  
42 **49** Thematic analysis will be used to determine themes and present the narrative findings with  
43  
44 **50** descriptive statistics presented in tabular format.  
45  
46  
47  
48

49 **51**  
50  
51 **52 Ethics and dissemination** Ethics approval for this scoping review study of the available  
52  
53 **53** literature is not required. We anticipate that the scoping review will identify the current evidence  
54  
55  
56  
57  
58  
59  
60

1  
2  
3 54 and design characteristics of digital prediction technologies for the timely and accurate  
4  
5 55 prediction of paediatric sepsis and factors influencing implementation and usability by clinicians.  
6  
7  
8 56 We plan to disseminate the preliminary findings from this review at national and international  
9  
10 57 research conferences in global and digital health, gathering critical feedback from multi-  
11  
12 58 disciplinary stakeholders.  
13  
14  
15 59

### 60 **Scoping review registration**

61 [https://osf.io/nh6qz/?view\\_only=8c840412a2a44117ac16fdf76e06abd6](https://osf.io/nh6qz/?view_only=8c840412a2a44117ac16fdf76e06abd6)  
62  
63

### 63 **Strengths and limitations of this study**

- 64 • This review is a novel approach to collectively synthesizing current research on designing  
65 paediatric sepsis prediction technologies, critically examining the relationships between  
66 their design, effectiveness and implementation in clinical settings to identify knowledge  
67 gaps requiring further investigation.
- 68 • The chosen review strategy will comprehensively evaluate the vast literature across  
69 various study types and research disciplines by a multi-disciplinary research team.
- 70 • The review will exclude digital prediction technologies for sepsis management and  
71 treatment after a diagnosis is confirmed and is limited to peer-reviewed literature written  
72 in the English language with a full-text version available.
- 73 • Literature focusing on age cohorts <90 days post-natal or >21 years old will be excluded  
74 due to significant differences in sepsis etiology and clinical presentation.

## 75 INTRODUCTION

76 Globally, it is estimated there were a total of 25.2 million cases of sepsis in children (<19) in  
 77 2017, imposing significant health care and societal burden (1). Healthcare costs for severe  
 78 paediatric sepsis hospitalizations reached approximately \$7.31 billion in the United States in  
 79 2016, accounting for almost 20% of total paediatric hospitalization costs (2). However, about  
 80 85% of global sepsis cases and 84.5% of sepsis-related deaths among all age groups occur in low  
 81 or middle-income countries, specifically sub-Saharan Africa and Southeast Asia (1). Annual  
 82 global mortality rates for children (<5) are approximately 2.9 million (Table 1) (3).

83  
 84 Table 1. Differences between global neonatal, paediatric, and adult sepsis (3).

|                                   | Neonatal (<90 days) | Paediatric (<5 y/o) | Adult (>20 y/o) |
|-----------------------------------|---------------------|---------------------|-----------------|
| <b>Annual Cases (Million)</b>     | 1.3 – 3.9           | 20.3                | 23.7            |
| <b>Annual Mortality (Million)</b> | 0.4 – 0.7           | 2.9                 | 7.7             |

85  
 86 Early recognition of sepsis in children is challenging. Unlike adult sepsis, children have  
 87 different sepsis aetiologies (3). For example, children commonly develop sepsis from  
 88 pneumonia, diarrhea, meningitis, or viral infections, whereas abdominal or genitourinary sources  
 89 are more common in adults (4). Differences in etiology can also be found between childhood and  
 90 neonatal sepsis, with early-onset neonatal sepsis having a distinct microbial pattern (5).  
 91 Predicting sepsis in children is also significantly more challenging due to maturation-based  
 92 differences in physiology (including immune system response), limitations in the communication  
 93 of symptoms, and diagnostic modalities (4,6,7). Sepsis can lead to life-altering organ dysfunction  
 94 if not identified quickly in children (8), where mortality rates are reduced two-fold if treated  
 95 within the first hour (4). Prediction of sepsis is confounded by the age-based symptom variations  
 96 within children, such as their differences in heart rate (4) and commonalities among other

1  
2  
3 97 childhood conditions and syndromes like Kawasaki syndrome or bronchiolitis (9). This milieu of  
4  
5 98 complex information combined with significant time pressure provides a significant cognitive  
6  
7  
8 99 burden for healthcare professionals to promptly identify the onset of deterioration that can lead to  
9  
10 100 this serious medical condition.

11  
12 101 In 2020, updated Paediatric Sepsis Survival guidelines were published calling for the  
13  
14 102 integration of screening standards in healthcare facilities to support rapid identification of sepsis  
15  
16  
17 103 in children (10) and provide the appropriate antimicrobial therapy at the proper time (5,10).  
18  
19 104 Established screening tools such as the Paediatric Early Warning Score (PEWS) may support the  
20  
21 105 timeliness of detecting clinical deterioration in children that can lead to sepsis (11). Recently,  
22  
23 106 adaptations to the Sequential Organ Assessment Score (SOFA) for paediatric patients (pSOFA)  
24  
25  
26 107 and neonates (nSOFA) have shown promise in identifying children at risk for mortality with  
27  
28 108 sepsis (12); however, it is controversial whether these scores provide value in low-resource  
29  
30 109 environments (13–15). Development and implementation of algorithms such as the Sepsis  
31  
32 110 Prediction and Optimization Therapy (SPOT) that can analyze electronic health data in real-time  
33  
34  
35 111 to provide a rule-based approach to initiate a physical sepsis screen have also been reported (16).  
36  
37 112 With the call from the World Health Organization to improve sepsis identification and the  
38  
39 113 potential for data-driven and knowledge-based technologies (3,17), digital prediction  
40  
41 114 technologies are becoming more advanced using mathematical, statistical, and machine learning  
42  
43 115 techniques to support sepsis prediction utilizing clinical information, symptoms, biomarkers, and  
44  
45 116 other signs at the bedside (18–21). While recent reviews have explored the literature on the  
46  
47 117 effectiveness of digital technologies for adult and neonate sepsis prediction (18,19,22–26), there  
48  
49 118 is currently no review on the design and implementation of these predictive tools for children.  
50  
51 119 Considering the pathophysiology and etiology of paediatric sepsis are different from that seen in  
52  
53  
54  
55  
56  
57  
58  
59  
60

1  
2  
3 120 adults and neonates (27), combined with the lack of widely accessible digital technologies for  
4  
5 121 children compared to adults (28), it is critically important to review the literature on this age  
6  
7 122 cohort.  
8  
9

10 123

### 12 124 **Prior reviews on sepsis prediction technologies**

14 125 Recent narrative reviews discuss machine learning-based technologies for adults and children  
15  
16 126 (20,29,30). However, the exclusion criteria for these reviews result in most of the included  
17  
18 127 literature focusing on technologies to predict adult sepsis, with only two (20) or three (29)  
19  
20 128 articles on paediatric sepsis. Some reviews excluded digital technologies that were not based on  
21  
22 129 “modern” machine learning models (21,30) or involved a broad search on infectious disease  
23  
24 130 prediction beyond sepsis (29). Recent narrative reviews have also limited their investigations to  
25  
26 131 PubMed/Medline, excluding other scientific or engineering databases, which may provide  
27  
28 132 greater insight into the design of digital technologies (20,26,30–32). One narrative review has  
29  
30 133 described the design, implementation, and performance of paediatric sepsis screening  
31  
32 134 technologies (30). However, the review included limited results on technologies based on  
33  
34 135 machine learning while focusing exclusively on US hospitals (30).  
35  
36  
37  
38  
39

40 136 Many systematic and scoping reviews have been rigorous in their search strategy but  
41  
42 137 similarly, report on screening tools and technologies for adult patients while excluding  
43  
44 138 paediatrics in their full-review criteria (24,25,28,33–36). They also do not include databases  
45  
46 139 among the engineering disciplines (19,23,37–39), as the objective of these reviews is generally  
47  
48 140 towards understanding the clinical effectiveness of these technologies and not the design  
49  
50 141 methodology. While previously published protocols for systematic reviews do not specify a  
51  
52 142 patient population inclusion or exclusion, some plan to exclude literature on the application of  
53  
54  
55  
56  
57  
58  
59  
60



1  
2  
3 143 machine learning models (38,40). This approach may not capture research on certain algorithm  
4  
5 144 types depending on the authors' definitions of artificial intelligence/machine learning. However,  
6  
7  
8 145 the completed reviews from these protocols (38,40) have not been found. While there have been  
9  
10 146 systematic reviews on the performance of neonatal sepsis prediction technologies providing  
11  
12 147 insight into their capabilities (19,23), none are focusing on the specifics of paediatric sepsis,  
13  
14 148 including their design and implementation.

15  
16  
17 149 Finally, current systematic reviews that include the paediatric literature as part of their  
18  
19 150 search strategy are limited in their search scope and do not focus on the design and  
20  
21 151 implementation requirements for this specific patient population (22,28,37). Two reviews  
22  
23 152 examine early warning systems for paediatric clinical deterioration, focusing on reporting  
24  
25 153 effectiveness in reducing adverse outcomes and identifying that there remains limited evidence  
26  
27 154 supporting the mandated use of these systems in hospitals (41,42). For sepsis specifically,  
28  
29 155 systematic reviews on automated prediction and decision-support systems have only identified  
30  
31 156 one (37) or three (22,28) related articles specific to children due to the period searched or  
32  
33 157 exclusion restrictions for how the technology was evaluated. One published protocol aims to  
34  
35 158 capture strategies for early recognition of paediatric sepsis from clinical deterioration (39).  
36  
37  
38 159 However, the review focuses on general strategy effectiveness and does not explicitly include  
39  
40 160 engineering databases such as IEEE or ACM Digital Library (39). While the systematic review  
41  
42 161 associated with the protocol mentioned above has not been found, the search strategy approach  
43  
44 162 may not completely capture the breadth of digital technologies developed for paediatric sepsis  
45  
46 163 (39). There is a need for a comprehensive scoping review, understanding the design and  
47  
48 164 evaluation of technologies for sepsis prediction in children, and highlighting where knowledge  
49  
50  
51  
52  
53  
54  
55  
56  
57  
58  
59  
60

1  
2  
3 165 gaps exist to inform future development and implementation that supports clinical decision-  
4  
5 166 making.

6  
7  
8 167

9  
10 168 **Purpose of the study**

11  
12 169 Given the limitations of recent literature reviews and the lack of reviews focused on paediatric  
13  
14 170 sepsis, it is necessary to scope the literature to identify the current evidence describing the  
15  
16 171 development of digital sepsis prediction technologies for this age cohort. The scoping review  
17  
18 172 defined by this protocol will identify and summarize the existing literature on the design,  
19  
20 173 effectiveness, and usability of digital sepsis prediction technologies in the paediatric population.  
21  
22 174 The scoping review, a methodology focusing on answering broader research questions through a  
23  
24 175 systematic search and presenting tabular findings along with a narrative integration (43), was  
25  
26 176 identified as the best approach for this review. We anticipate that this methodology will warrant  
27  
28 177 a meaningful summary of the current development of digital technologies for sepsis prediction  
29  
30 178 that can inform future research towards improving their performance and evidence-based clinical  
31  
32 179 implementation to improve the lives of children globally.  
33  
34  
35  
36  
37

38 180

39  
40 181 **METHODS AND ANALYSIS**

41  
42 182 The reviewers on this scoping review consist of a multi-disciplinary team of engineers, a health  
43  
44 183 researcher/biomedical engineering research librarian, a psychology student, and a paediatric  
45  
46 184 clinician. Our methodology will be guided by the framework developed by Arksey and O'Malley  
47  
48 185 (43), which iterates through six steps: (i) identifying the research question; (ii) searching for  
49  
50 186 relevant studies; (iii) selecting the studies; (iv) charting the data; (v) collating, summarizing, and  
51  
52 187 reporting the results; and (vi) consulting with stakeholders to inform or validate findings. The  
53  
54  
55  
56  
57  
58  
59

1  
2  
3 188 sixth step is optional, and we will modify this step to consult with experts specifically around  
4  
5 189 finding technologies used in hospital or industry settings. Levac's recommendations for  
6  
7 190 independent full-text reviews by at least two reviewers will also be followed (44). This study  
8  
9 191 protocol will follow the Preferred Reporting Items for Systematic Review and Meta-Analysis  
10  
11 192 extension for a scoping review (PRISMA-ScR) (45), with any gaps being filled by the Preferred  
12  
13 193 Reporting Items for Systematic Review and Meta-Analysis extension for protocols (PRISMA-P)  
14  
15 194 [see Additional file 1]. This protocol has been registered on the Open Science Framework  
16  
17 195 ([https://osf.io/nh6qz/?view\\_only=8c840412a2a44117ac16fdf76e06abd6](https://osf.io/nh6qz/?view_only=8c840412a2a44117ac16fdf76e06abd6)).  
18  
19  
20  
21  
22  
23

### 24 197 **Step 1: identifying the research question**

25  
26 198 The research questions were identified through an initial search of the literature on predictive  
27  
28 199 electronic clinical prediction technologies for sepsis and gaps identified in current systematic and  
29  
30 200 narrative reviews. The following questions maintain a broad scope for understanding the existing  
31  
32 201 evidence on digital sepsis prediction technologies and their clinical implementation in the  
33  
34 202 paediatric context:

- 35 203 1. How are digital sepsis prediction technologies currently designed and developed?
- 36 204 2. What is the effectiveness and usability of digital technologies in predicting sepsis in  
37 205 clinical settings?
- 38 206 3. What gaps exist in understanding how to effectively improve the design and  
39 207 implementation of digital technologies for sepsis prediction?

### 40 208 41 209 **Step 2: identifying relevant studies**

210 We will conduct a comprehensive scoping review that includes a multi-disciplinary group of  
 211 scholarly databases: Association of Computing Machinery (ACM) Digital Library, Cumulative  
 212 Index to Nursing and Allied Health Literature (CINAHL), Embase, Google Scholar, Institute of  
 213 Electric and Electronic Engineers (IEEE), PubMed, Scopus, and Web of Science. Articles will  
 214 also be identified using the snowballing technique (46), to identify relevant literature among the  
 215 references and citations of articles included for the full review. We will additionally hand-search  
 216 for literature on the design, validation, and implementation of commercial digital technologies  
 217 for sepsis prediction, which may be approved by governing bodies such as Health Canada  
 218 ([health-products.canada.ca/mdall-limh/](http://health-products.canada.ca/mdall-limh/)), the Food and Drug Administration  
 219 ([accessdata.fda.gov/scripts/cdrh/cfdocs/cfml/textsearch.cfm](http://accessdata.fda.gov/scripts/cdrh/cfdocs/cfml/textsearch.cfm)), and the European Union Medical  
 220 Device Regulation ([ec.europa.eu/tools/eudamed/#/screen/home](http://ec.europa.eu/tools/eudamed/#/screen/home)).

221 We have developed a search strategy for each database to support our comprehensive  
 222 literature search. Our approach employs keywords, medical subject headings (MeSH), key  
 223 concept subject headings, and Boolean terms. A sample search strategy for PubMed is presented  
 224 in Table 2.

225 Table 2. Sample search strategy and results.

| Database      | Search Terms                                                                                                                                                                                                                                                                                                                                                                                                                                                                                                                                                                                                                                                                                                            | Results | Date       |
|---------------|-------------------------------------------------------------------------------------------------------------------------------------------------------------------------------------------------------------------------------------------------------------------------------------------------------------------------------------------------------------------------------------------------------------------------------------------------------------------------------------------------------------------------------------------------------------------------------------------------------------------------------------------------------------------------------------------------------------------------|---------|------------|
| <b>PubMed</b> | ("decision support"[All Fields] OR "decision-support"[All Fields] OR "early warning score"[MeSH Terms] OR "early warning score"[All Fields] OR "smart system*"[All Fields] OR "electronic alert*"[All Fields] OR "artificial intelligence"[All Fields] OR "artificial intelligence"[MeSH Terms] "machine learning"[All Fields] OR "deep learning"[All Fields] OR "neural network*"[All Fields] OR "support vector machine"[All Fields] OR "hidden markov model"[All Fields] OR "statistical learning"[All Fields] OR "predictive function"[All Fields] OR "algorithm"[All Fields] OR "algorithms"[MeSH Terms] OR "automat*"[All Fields] OR "comput*"[All Fields] OR "decision making, computer assisted"[MeSH Terms] OR | 15,531  | 02/15/2022 |

---

"electronic\*" [All Fields] OR "representation learning" [All Fields] OR "conformal prediction" [All Fields] OR "random forest" [All Fields] OR "naïve bayes" [All Fields] OR "regression" OR "regression analysis" [MeSH Terms] OR "gradient boosting" [All Fields] OR "artificial learning" [All Fields] OR "machine intelligence" [All Fields] OR "probabilistic network\*" [All Fields] OR "knowledge representation" [All Fields] OR "bayesian learning" [All Fields] OR "expert system\*" [All Fields] OR "technology assisted" [All Fields] OR "computer assisted" [All Fields] OR "statistical" [All Fields] OR "mathematical" [All Fields]) AND ("system" [All Fields] OR "tool" [All Fields] OR "alert\*" [All Fields] OR "technology" [All Fields] OR "software" [All Fields] OR "model\*" [All Fields] OR "engine" [All Fields] OR "approach\*" [All Fields] OR "algorithm" [All Fields] OR "platform" [All Fields] OR "method\*" [All Fields] OR "scor\*" [All Fields] OR "device" [All Fields]) AND ("sepsis" [All Fields] OR "sepsis" [MeSH Terms] OR "septic shock" [All Fields] OR "systemic inflammatory response syndrome" [All Fields] OR "acute deterioration" [All Fields] OR "patient deterioration" [All Fields] OR "clinical deterioration" [MeSH Terms] OR "clinical deterioration" [All Fields] OR "severe infection" [All Fields] OR "severe bacterial infection" [All Fields] OR "bacterial infections" [MeSH Terms] OR "febrile illness" [All Fields] OR "non-malarial febrile illness" [All Fields] OR "bacteremia" [All Fields] OR "bacteremia" [MeSH Terms]) AND ("diagnos\*" [All Fields] OR "detect\*" [All Fields] OR "predict\*" [All Fields] OR "prognosticate" [All Fields] OR "identif\*" [All Fields] OR "infer\*" [All Fields] OR "warn\*" [All Fields] OR "alert\*" [All Fields] OR "recog\*" [All Fields] OR "screen\*" [All Fields] OR "monitor\*" [All Fields] OR "assess\*" [All Fields] OR "surveillance" [All Fields] OR "classif\*" [All Fields] ) AND ( "evaluat\*" [All Fields] OR "implement\*" [All Fields] OR "perform\*" [All Fields] OR "design" [All Fields] OR "validat\*" [All Fields] OR "usability" [All Fields] OR "effectiveness" [All Fields] OR "efficiency" [All Fields] OR "satisfaction" [All Fields] OR "safety" [All Fields] OR "acceptance" [All Fields] OR "clinical value" [All Fields] OR "interpret\*" [All Fields] OR "perception" [All Fields] OR "perspective" [All Fields] OR "opinion" [All Fields] OR "error" [All Fields] ) AND ("child\*" [All Fields] OR "paediatric" [All Fields] OR "pediatric" [All Fields] OR "pediatrics" [MeSH Terms] OR

---

---

"toddler\*"[All Fields] OR "teen\*"[All Fields] OR  
"youth\*"[All Fields] OR "adolescen\*"[All Fields] OR  
"adolescent"[MeSH Terms] OR "infan\*"[All Fields] OR  
"infant"[MeSH Terms] OR "school age\*"[All Fields] OR  
"PICU"[All Fields])

---

226  
227 The search results will be imported to Mendeley's reference management software for  
228 future referencing and organization (Mendeley Ltd.). A systematic review management software,  
229 Covidence (Veritas Health Innovation Ltd.), will be used to identify and merge duplicate articles.  
230 A sample of 20 abstracts will be initially screened by two reviewers (RT and JG), ensuring the  
231 inclusion-exclusion requirements are robust in capturing relevant articles related to the design  
232 and evaluation of digital prediction technologies for paediatric sepsis. Both reviewers will also  
233 ensure that the data extraction items capture valuable and appropriate study details from the  
234 articles included in the full-text review, which will be shared with the research team.

235

### 236 **Step 3: study selection**

#### 237 ***Inclusion criteria***

238 The proposed review will include articles that meet the following inclusion criteria:

- 239 • The article is written in English
- 240 • The article is a peer-reviewed journal article, full conference proceeding, or research  
241 published on a commercially available digital technology which may be approved by a  
242 medical device regulatory body
- 243 • The article includes the description of a digital prediction technology indicative of at least  
244 one aspect of clinical deterioration that may lead to sepsis in children (>90 days post-  
245 natal to <21 years old)

- 1  
2  
3 246 • The article describes how the digital technology was designed, validated for its  
4  
5 247 effectiveness, or evaluated for its usability in the context of a healthcare facility  
6  
7  
8 248 • The article discusses the features and, if applicable, the dataset used in its design  
9  
10 249 • There is no specification for publication years  
11  
12  
13 250

14  
15 251 ***Exclusion criteria***

16  
17 252 Screened that include any of the following factors will be excluded from this review:  
18

- 19 253 • Commentaries  
20  
21 254 • Dissertations  
22  
23 255 • Editorials  
24  
25 256 • Books and book chapters  
26  
27 257 • Lectures and addresses  
28  
29 258 • Study protocols  
30  
31 259 • Review articles  
32  
33 260 • Articles inaccessible for full-text review  
34  
35 261 • Digital technologies informing sepsis treatment strategies  
36  
37 262 • Digital technologies with proposed use outside a healthcare facility  
38  
39 263 • Digital technologies that predict mortality risk from sepsis  
40  
41  
42  
43  
44

45 264

46  
47  
48 265 ***Selection process***

49  
50 266 This review will follow the reporting checklist in the Preferred Reporting Items for Systematic  
51  
52 267 reviews and Meta-Analyses extension for Scoping Reviews (PRISMA-ScR), provided by Tricco  
53  
54 268 et al. (45). First, all relevant articles will be imported into Covidence. Second, two reviewers (RT  
55  
56  
57  
58  
59  
60

1  
2  
3 269 and JG) will independently perform the title and abstract screening using the developed  
4  
5 270 eligibility criteria by classifying them as “Yes,” “No.” Any article classified as “Yes” by RT or  
6  
7 271 JG will be included in the full-text review during this stage by adding them to an Excel  
8  
9 272 spreadsheet for access by all authors. If a full-text article cannot be accessed, the reviewers will  
10  
11 273 seek assistance from library services at the institution or directly contact the article’s  
12  
13 274 corresponding author. Third, two investigators (RT and JG) will independently perform the full-  
14  
15 275 text screening for eligibility using the listed inclusion-exclusion criteria. A third member of the  
16  
17 276 research team will resolve any disagreements on eligibility that occur during the full-text review.  
18  
19 277 After the full-text review, an inter-rater agreement will be calculated using Cohen’s kappa  
20  
21 278 coefficient ( $\kappa$ ) statistic.  
22  
23  
24  
25

26 279

#### 28 280 **Step 4: charting the data**

29  
30 281 The data extraction form will be developed in Covidence and exported to Excel to capture the  
31  
32 282 relevant information from each article. Two reviewers (RT, JG) will individually extract the  
33  
34 283 relevant data from a sample of eligible articles screened for inclusion in the full-text review to  
35  
36 284 ensure consistency of recording data. Any disagreements on extracted data will be resolved  
37  
38 285 through discussion between the reviewers. The form will be iteratively updated until the authors  
39  
40 286 reach a consensus on the relevant data to extract. We will begin by pulling the following type of  
41  
42 287 data into the form, with additional data included as we screen more articles:  
43  
44  
45

- 46 288 • Author(s) and date published
  - 47 289 • Study location
  - 48 290 • Document type
  - 49 291 • Discipline
- 50  
51  
52  
53  
54  
55  
56  
57  
58  
59  
60



- 1  
2  
3 292 • Objective  
4  
5  
6 293 • Use setting type  
7  
8 294 ○ Prevalence of sepsis in the use setting  
9  
10 295 • Age cohort  
11  
12 296 • Number of participants  
13  
14  
15 297 • Research methodology: retrospective, prospective  
16  
17 298 • Study design  
18  
19  
20 299 • Sepsis prediction approach/method  
21  
22 300 • Design of the digital prediction technology  
23  
24 301 ○ Data source  
25  
26 302 ○ Model type: data-driven, knowledge-based  
27  
28  
29 303 ○ Interface/Platform  
30  
31 304 ○ Data flow: continuous, discrete  
32  
33 305 ○ Prediction objective: sepsis, severe sepsis, septic shock, sepsis severity  
34  
35  
36 306 ○ Definition of the prediction objective  
37  
38 307 ○ Design process/approach  
39  
40 308 ■ Workflow integration: triage, monitoring, discharge  
41  
42  
43 309 ○ Clinical predictors  
44  
45 310 ■ Vital signs  
46  
47 311 ■ Biomarkers  
48  
49  
50 312 ■ Anthropometric data  
51  
52 313 ■ Sociodemographic information  
53  
54 314 ■ Administrative variables  
55  
56  
57  
58  
59  
60

- 1  
2  
3 315                   ▪ Medical history variables  
4  
5 316           ○ Equity considerations (47,48)  
6  
7 317                   ▪ Bias: quantitative or qualitative misrepresentations of particular patient  
8  
9                   groups  
10 318  
11  
12 319                   ▪ Fairness: impacts on various demographic groups  
13  
14                   ▪ Appropriateness: adaptations for specific patient groups or use contexts  
15 320  
16  
17 321   • Measures used for validating the performance and implementation of the digital  
18  
19 322   prediction technology  
20  
21           ○ Confirmation method for a true positive sepsis case  
22 323  
23  
24 324           ○ Quantitative values  
25  
26 325                   ▪ Firing rate/Proportion positive  
27  
28                   ▪ Specificity  
29 326  
30  
31 327                   ▪ Sensitivity  
32  
33 328                   ▪ Area under the receiver operating curve  
34  
35 329                   ▪ Positive predictive value  
36  
37                   ▪ Negative predictive value  
38 330  
39  
40 331                   ▪ Risk ratio  
41  
42 332                   ▪ Machine learning performance measures  
43  
44                   ▪ Prediction timing  
45 333  
46  
47 334                   ▪ Mortality rates  
48  
49 335                   ▪ Intervention/Treatment outcomes  
50  
51 336                   ▪ Method for handling missing data  
52  
53                   ▪ Comparison to other sepsis prediction algorithms  
54 337  
55  
56  
57  
58  
59  
60

- 338 ○ User focused outcomes
  - 339 ■ Usability: effectiveness, efficiency, satisfaction, safety
  - 340 ■ User feedback
  - 341 ■ User error
  - 342 ■ User acceptance and trust
- 343 ○ Clinical value provided
- 344 ○ Evaluation of bias, fairness or appropriateness
- 345 ● Conclusion/Primary Findings
  - 346 ○ Future steps/research

347

### 348 **Step 5: collating, summarizing, and reporting the results**

349 The extracted data will be synthesized within tables that summarize the current digital  
350 technology landscape in predicting paediatric sepsis, including characteristics that describe their  
351 effectiveness and implementation by health care providers. We will quantitatively identify the  
352 number of similar approaches toward model and algorithm development for digital sepsis  
353 prediction technologies and their interface and delivery platform. We will also report their  
354 quantitative performance and implementation outcomes such as sensitivity and specificity,  
355 mortality rates, and impacts on earlier intervention times through descriptive statistics. We will  
356 then perform a thematic analysis to identify relevant themes and sub-themes related to our  
357 scoping review objectives. The analysis will include an organization of themes on the usability  
358 and implementation of digital prediction technologies in clinical contexts related to clinician-  
359 system interaction and gaps in improving clinical integration, which will be presented as a  
360 narrative. Diagrams will be developed to visualize the relationships and themes between the

1  
2  
3 361 design of digital technologies for paediatric sepsis prediction and their influence on system  
4  
5 362 effectiveness and implementation throughout time to highlight further knowledge gaps and  
6  
7 363 opportunities for future investigation.  
8  
9

10 364

### 11 365 **Step 6: methodological quality appraisal**

12  
13  
14 366 We will consult with experts in paediatric sepsis prediction digital technologies for this review to  
15  
16 367 identify those applied in clinical settings. While critical appraisal of the identified articles is not  
17  
18 368 mandatory in the scoping review methodology, we will consult with stakeholders to inform and  
19  
20 369 validate our findings.  
21  
22  
23

24 370

### 25 371 **Patient and public involvement**

26  
27 372 There were no patients or public involvement in the development of this protocol.  
28  
29  
30

31 373

### 32 374 **ETHICS AND DISSEMINATION**

33  
34  
35 375 Approval from an ethics review committee is not required for this study because it is a scoping  
36  
37 376 review of previously published literature. Once the review is completed, we plan to disseminate  
38  
39 377 the preliminary findings at national and international research conferences in global and digital  
40  
41 378 health to gather critical feedback from researchers and the public. The finalized results from the  
42  
43 379 review will be submitted for publication in an open access peer-reviewed journal.  
44  
45  
46

47 380

### 48 381 **DISCUSSION**

49  
50  
51 382 This scoping review will provide a comprehensive and structured understanding of the digital  
52  
53 383 technologies that have been developed to support the timely prediction of paediatric sepsis. The  
54  
55  
56  
57  
58  
59

1  
2  
3 384 results will focus on design, validation, and implementation, which will be analyzed thematically  
4  
5 385 and reported in data summary tables, indicating how the development of these technologies is  
6  
7 386 evolving throughout time. It is anticipated that the outcomes will reveal the current challenges in  
8  
9 387 designing and implementing clinically meaningful digital prediction technologies for paediatric  
10  
11 388 sepsis across various clinical environments. Furthermore, the results are expected to identify  
12  
13 389 critical research aspects requiring further investigation that may contribute toward developing  
14  
15 390 future successful technologies.  
16  
17  
18

19 391       Compared to previous reviews, this scoping review focuses on the complexities of  
20  
21 392 paediatric sepsis, with a methodological strength in taking a comprehensive and systematic  
22  
23 393 approach that will provide an overview of the evidence in this digital technology landscape.  
24  
25 394 Inherent in this approach is the limitation of its objective: to summarize the literature and  
26  
27 395 identify meaningful gaps for further research. As this study will include articles with various  
28  
29 396 study designs, it does not aim to answer specific questions about recommending the use or  
30  
31 397 application of certain sepsis prediction technologies for paediatrics. With the results of the pilot  
32  
33 398 search (Table 2), this review is also limited in its scope, where non-English articles or articles  
34  
35 399 without a full-text version will not be included. Finally, digital technologies informing treatment  
36  
37 400 strategies for sepsis and studies looking at age cohorts <90 days post-natal or >21 years old will  
38  
39 401 be excluded because of significant differences in sepsis etiology and clinical presentation. We  
40  
41 402 plan to adequately convey the overall strengths and limitations once the review is completed,  
42  
43 403 including any deviations from the protocol.  
44  
45  
46  
47  
48

49 404       In conclusion, by mapping the attributes of paediatric sepsis prediction technologies to  
50  
51 405 outcomes related to clinical implementation and performance, we anticipate that our results will  
52  
53 406 highlight critical research gaps among the medical, engineering, and computer science  
54  
55  
56  
57  
58  
59  
60

1  
2  
3 407 disciplines. The results may inform research on identifying relevant predictive indicators best  
4  
5 408 suited for the design of digital technologies in specific use contexts and environments,  
6  
7 409 improvements towards model development for sepsis prediction, and factors supporting the  
8  
9 410 optimal workflow integration of digital prediction systems by clinicians. Ultimately, this review  
10  
11 411 will be critical for advancing knowledge to improve sepsis prediction for children globally.  
12  
13  
14  
15 412

### 16 17 413 **List of abbreviations**

18  
19 414 ACM: Association of Computing Machinery

20  
21 415 CINAHL: Cumulative Index to Nursing and Allied Health Literature

22  
23 416 IEEE: Institute of Electric and Electronic Engineers

24  
25 417 nSOFA: neonatal Sequential Organ Assessment Score

26  
27 418 PEWS: Paediatric Early Warning Score

28  
29 419 PRISMA-P: Preferred Reporting Items for Systematic Review and Meta-Analysis extension for  
30  
31 420 protocols

32  
33 421 PRISMA-ScR: Preferred Reporting Items for Systematic Review and Meta-Analysis extension  
34  
35 422 for scoping reviews

36  
37 423 pSOFA: paediatric Sequential Organ Assessment Score

38  
39 424 SOFA: Sequential Organ Assessment Score

40  
41 425 SPOT: Sepsis Prediction and Optimization Therapy

42  
43 426

### 44 45 427 **Author contributions**

46  
47 428 RT is the guarantor of the review and drafted the initial manuscript. All authors contributed to  
48  
49 429 the development of the search strategy, selection criteria, and data extraction template. MA  
50  
51  
52  
53  
54  
55  
56  
57  
58  
59  
60

1  
2  
3 430 provided expertise on paediatric sepsis. All authors critically reviewed the protocol for  
4  
5 431 intellectual content, subsequently revised it for publication, and read and approved the final  
6  
7  
8 432 version.  
9

10 433

11  
12 434 **Availability of data and materials**

13  
14 435 The datasets used and analyzed during the current study will be available in the Pediatric Sepsis  
15  
16  
17 436 Data CoLab repository: [https://dataverse.scholarsportal.info/dataverse/Pedi\\_SepsisCoLab](https://dataverse.scholarsportal.info/dataverse/Pedi_SepsisCoLab).  
18

19 437

20  
21 438 **Funding statement**

22  
23  
24 439 Not applicable.  
25

26 440

27  
28 441 **Competing interests statement**

29  
30  
31 442 The authors declare that they have no competing interests.  
32

33 443

34  
35 444 **Acknowledgements**

36  
37  
38 445 RT is supported by an Engineering Excellence Doctoral Fellowship from the University of  
39  
40 446 Waterloo Faculty of Engineering.  
41  
42  
43  
44  
45  
46  
47  
48  
49  
50  
51  
52  
53  
54  
55  
56  
57  
58  
59  
60

447 **REFERENCES**

- 448 1. Rudd KE, Johnson SC, Agesa KM, Shackelford KA, Tsoi D, Kievlan DR, et al. Global,  
449 regional, and national sepsis incidence and mortality, 1990–2017: analysis for the Global  
450 Burden of Disease Study. *The Lancet*. 2020 Jan;395(10219):200–11.
- 451 2. Carlton EF, Barbaro RP, Iwashyna T “Jack”, Prescott HC. Cost of Pediatric Severe Sepsis  
452 Hospitalizations. *JAMA Pediatrics*. 2019 Oct 1;173(10):986.
- 453 3. World Health Organization. Global Report on Epidemiology and Burden of Sepsis  
454 [Internet]. Geneva; 2020 [cited 2022 Jan 25]. Available from:  
455 <https://apps.who.int/iris/bitstream/handle/10665/334216/9789240010789-eng.pdf>
- 456 4. Emr BM, Alcamo AM, Carcillo JA, Aneja RK, Mollen KP. Pediatric Sepsis Update: How  
457 Are Children Different? *Surgical Infections*. 2018 Feb;19(2):176–83.
- 458 5. Aneja RK, Varughese-Aneja R, Vetterly CG, Carcillo JA. Antibiotic Therapy in Neonatal  
459 and Pediatric Septic Shock. *Current Infectious Disease Reports*. 2011 Oct 6;13(5):433–41.
- 460 6. Peshimam N, Nadel S. Sepsis in children: state-of-the-art treatment. *Therapeutic*  
461 *Advances in Infectious Disease*. 2021 Jan 23;8:204993612110553.
- 462 7. Davis AL, Carcillo JA, Aneja RK, Deymann AJ, Lin JC, Nguyen TC, et al. American  
463 College of Critical Care Medicine Clinical Practice Parameters for Hemodynamic Support  
464 of Pediatric and Neonatal Septic Shock. *Critical Care Medicine*. 2017 Jun;45(6):1061–93.
- 465 8. Peshimam N, Nadel S. Sepsis in children: state-of-the-art treatment. *Therapeutic*  
466 *Advances in Infectious Disease*. 2021 Jan 23;8:204993612110553.
- 467 9. Cox MI, Voss H. Improving sepsis recognition and management. *Current Problems in*  
468 *Pediatric and Adolescent Health Care*. 2021 Apr;51(4):101001.



- 1  
2  
3 469 10. Cotten CM. Antibiotic Stewardship. *Clinics in Perinatology* [Internet]. 2015  
4  
5 470 Mar;42(1):195–206. Available from:  
6  
7 471 <https://linkinghub.elsevier.com/retrieve/pii/S009551081400116X>  
8  
9  
10 472 11. Lambert V, Matthews A, MacDonell R, Fitzsimons J. Paediatric early warning systems for  
11  
12 473 detecting and responding to clinical deterioration in children: a systematic review. *BMJ*  
13  
14 474 *Open*. 2017 Mar 13;7(3):e014497.  
15  
16 475 12. Humoodi MO, Aldabbagh MA, Salem MM, al Talhi YM, Osman SM, Bakhsh M, et al.  
17  
18 476 Epidemiology of pediatric sepsis in the pediatric intensive care unit of king Abdulaziz  
19  
20 477 Medical City, Jeddah, Saudi Arabia. *BMC Pediatrics*. 2021 Dec 7;21(1):222.  
21  
22  
23 478 13. Wynn JL, Polin RA. A neonatal sequential organ failure assessment score predicts  
24  
25 479 mortality to late-onset sepsis in preterm very low birth weight infants. *Pediatric Research*.  
26  
27 480 2020 Jul 1;88(1):85–90.  
28  
29  
30 481 14. Schlapbach LJ, Straney L, Bellomo R, MacLaren G, Pilcher D. Prognostic accuracy of  
31  
32 482 age-adapted SOFA, SIRS, PELOD-2, and qSOFA for in-hospital mortality among  
33  
34 483 children with suspected infection admitted to the intensive care unit. *Intensive Care*  
35  
36 484 *Medicine*. 2018 Feb 19;44(2):179–88.  
37  
38  
39 485 15. Matics TJ, Sanchez-Pinto LN. Adaptation and Validation of a Pediatric Sequential Organ  
40  
41 486 Failure Assessment Score and Evaluation of the Sepsis-3 Definitions in Critically Ill  
42  
43 487 Children. *JAMA Pediatrics*. 2017 Oct 2;171(10):e172352.  
44  
45  
46 488 16. Perlin JB, Jackson E, Hall C, Mindick A, Berberich G, Korwek K, et al. 2019 John M.  
47  
48 489 Eisenberg Patient Safety and Quality Awards: SPOTting Sepsis to Save Lives: A  
49  
50 490 Nationwide Computer Algorithm for Early Detection of Sepsis. *The Joint Commission*  
51  
52 491 *Journal on Quality and Patient Safety*. 2020 Jul;46(7):381–91.  
53  
54  
55  
56  
57  
58  
59  
60

- 1  
2  
3 492 17. Ansermino JM, Wiens MO, Kissoon N. We need smarter trigger tools for diagnosing  
4  
5 493 sepsis in children in Canada. *Canadian Medical Association Journal*. 2018 Sep  
6  
7 494 10;190(36):E1060–1.  
8  
9  
10 495 18. Yin J, Ngiam KY, Teo HH. Role of Artificial Intelligence Applications in Real-Life  
11  
12 496 Clinical Practice: Systematic Review. *Journal of Medical Internet Research*. 2021 Apr  
13  
14 497 22;23(4):e25759.  
15  
16  
17 498 19. Persad E, Jost K, Honoré A, Forsberg D, Coste K, Olsson H, et al. Neonatal sepsis  
18  
19 499 prediction through clinical decision support algorithms: A systematic review. *Acta*  
20  
21 500 *Paediatrica*. 2021 Dec 12;110(12):3201–26.  
22  
23  
24 501 20. Schinkel M, Paranjape K, Nannan Panday RS, Skyttberg N, Nanayakkara PWB. Clinical  
25  
26 502 applications of artificial intelligence in sepsis: A narrative review. *Computers in Biology*  
27  
28 503 *and Medicine*. 2019 Dec;115:103488.  
29  
30  
31 504 21. Sundararajan S, Doctor A. Early recognition of neonatal sepsis using a bioinformatic vital  
32  
33 505 sign monitoring tool. *Pediatric Research*. 2021 Oct 29;  
34  
35 506 22. Al-Shwaheen TI, Moghbel M, Hau YW, Ooi CY. Use of learning approaches to predict  
36  
37 507 clinical deterioration in patients based on various variables: a review of the literature.  
38  
39 508 *Artificial Intelligence Review*. 2021 Mar 13;  
40  
41  
42 509 23. Sahu P, Raj Stanly EA, Simon Lewis LE, Prabhu K, Rao M, Kunhikatta V. Prediction  
43  
44 510 modelling in the early detection of neonatal sepsis. *World Journal of Pediatrics*. 2022 Jan  
45  
46 511 5;  
47  
48  
49 512 24. Hassan N, Slight R, Weiland D, Vellinga A, Morgan G, Aboushareb F, et al. Preventing  
50  
51 513 sepsis; how can artificial intelligence inform the clinical decision-making process? A  
52  
53 514 systematic review. *International Journal of Medical Informatics*. 2021 Jun;150:104457.  
54  
55  
56  
57  
58  
59  
60

- 1  
2  
3 515 25. Muralitharan S, Nelson W, Di S, McGillion M, Devereaux P, Barr NG, et al. Machine  
4  
5 516 Learning–Based Early Warning Systems for Clinical Deterioration: Systematic Scoping  
6  
7 517 Review. *Journal of Medical Internet Research*. 2021 Feb 4;23(2):e25187.
- 8  
9  
10 518 26. Wu M, Du X, Gu R, Wei J. Artificial Intelligence for Clinical Decision Support in Sepsis.  
11  
12 519 *Frontiers in Medicine*. 2021 May 13;8.
- 13  
14 520 27. S. Wheeler D. "Children are not Small Adults!". *The Open Inflammation Journal*. 2011  
15  
16 521 Oct 7;4(1):4–15.
- 17  
18 522 28. Wulff A, Montag S, Marschollek M, Jack T. Clinical Decision-Support Systems for  
19  
20 523 Detection of Systemic Inflammatory Response Syndrome, Sepsis, and Septic Shock in  
21  
22 524 Critically Ill Patients: A Systematic Review. *Methods of Information in Medicine*. 2019  
23  
24 525 Dec 9;58(S 02):e43–57.
- 25  
26 526 29. Peiffer-Smadja N, Rawson TM, Ahmad R, Buchard A, Georgiou P, Lescure F-X, et al.  
27  
28 527 Machine learning for clinical decision support in infectious diseases: a narrative review of  
29  
30 528 current applications. *Clinical Microbiology and Infection*. 2020 May;26(5):584–95.
- 31  
32 529 30. Eisenberg MA, Balamuth F. Pediatric sepsis screening in US hospitals. *Pediatric*  
33  
34 530 *Research*. 2021 Aug 20;
- 35  
36 531 31. Teng AK, Wilcox AB. A Review of Predictive Analytics Solutions for Sepsis Patients.  
37  
38 532 *Applied Clinical Informatics*. 2020 May 27;11(03):387–98.
- 39  
40 533 32. Ocampo-Quintero N, Vidal-Cortés P, del Río Carbajo L, Fdez-Riverola F, Reboiro-Jato  
41  
42 534 M, Glez-Peña D. Enhancing sepsis management through machine learning techniques: A  
43  
44 535 review. *Medicina Intensiva*. 2020 May;
- 45  
46  
47  
48  
49  
50  
51  
52  
53  
54  
55  
56  
57  
58  
59  
60

- 1  
2  
3 536 33. Fernandes M, Vieira SM, Leite F, Palos C, Finkelstein S, Sousa JMC. Clinical Decision  
4  
5 537 Support Systems for Triage in the Emergency Department using Intelligent Systems: a  
6  
7 538 Review. *Artificial Intelligence in Medicine*. 2020 Jan;102:101762.
- 8  
9  
10 539 34. Fleuren LM, Klausch TLT, Zwager CL, Schoonmade LJ, Guo T, Roggeveen LF, et al.  
11  
12 540 Machine learning for the prediction of sepsis: a systematic review and meta-analysis of  
13  
14 541 diagnostic test accuracy. *Intensive Care Medicine*. 2020 Mar 21;46(3):383–400.
- 15  
16  
17 542 35. Makam AN, Nguyen OK, Auerbach AD. Diagnostic accuracy and effectiveness of  
18  
19 543 automated electronic sepsis alert systems: A systematic review. *Journal of Hospital*  
20  
21 544 *Medicine*. 2015 Jun;10(6):396–402.
- 22  
23  
24 545 36. Smyth MA, Brace-McDonnell SJ, Perkins GD. Identification of adults with sepsis in the  
25  
26 546 prehospital environment: a systematic review. *BMJ Open*. 2016 Aug 5;6(8):e011218.
- 27  
28 547 37. Despins LA. Automated Detection of Sepsis Using Electronic Medical Record Data: A  
29  
30 548 Systematic Review. *Journal for Healthcare Quality*. 2017 Nov;39(6):322–33.
- 31  
32  
33 549 38. Li L, Ackermann K, Baker J, Westbrook J. Use and Evaluation of Computerized Clinical  
34  
35 550 Decision Support Systems for Early Detection of Sepsis in Hospitals: Protocol for a  
36  
37 551 Scoping Review. *JMIR Research Protocols*. 2020 Nov 20;9(11):e24899.
- 38  
39  
40 552 39. Patton L, Young V. Effectiveness of provider strategies for the early recognition of  
41  
42 553 clinical deterioration due to sepsis in pediatric patients. *JBIC Database of Systematic*  
43  
44 554 *Reviews and Implementation Reports*. 2017 Jan;15(1):76–85.
- 45  
46  
47 555 40. Pepic I, Feldt R, Ljungström L, Torkar R, Dalevi D, Maurin Söderholm H, et al. Early  
48  
49 556 detection of sepsis using artificial intelligence: a scoping review protocol. *Systematic*  
50  
51 557 *Reviews*. 2021 Dec 16;10(1):28.
- 52  
53  
54  
55  
56  
57  
58  
59  
60

- 1  
2  
3 558 41. Chapman SM, Wray J, Oulton K, Peters MJ. Systematic review of paediatric track and  
4  
5 559 trigger systems for hospitalised children. *Resuscitation*. 2016 Dec;109:87–109.  
6  
7  
8 560 42. Trubey R, Huang C, Lugg-Widger F v, Hood K, Allen D, Edwards D, et al. Validity and  
9  
10 561 effectiveness of paediatric early warning systems and track and trigger tools for  
11  
12 562 identifying and reducing clinical deterioration in hospitalised children: a systematic  
13  
14 563 review. *BMJ Open*. 2019 May 5;9(5):e022105.  
15  
16  
17 564 43. Arksey H, O'Malley L. Scoping studies: towards a methodological framework.  
18  
19 565 *International Journal of Social Research Methodology*. 2005 Feb;8(1):19–32.  
20  
21  
22 566 44. Levac D, Colquhoun H, O'Brien KK. Scoping studies: advancing the methodology.  
23  
24 567 *Implementation Science*. 2010 Dec 20;5(1):69.  
25  
26 568 45. Tricco AC, Lillie E, Zarin W, O'Brien KK, Colquhoun H, Levac D, et al. PRISMA  
27  
28 569 Extension for Scoping Reviews (PRISMA-ScR): Checklist and Explanation. *Annals of*  
29  
30 570 *Internal Medicine*. 2018 Oct 2;169(7):467–73.  
31  
32  
33 571 46. Wohlin C. Guidelines for snowballing in systematic literature studies and a replication in  
34  
35 572 software engineering. In: *Proceedings of the 18th International Conference on Evaluation*  
36  
37 573 *and Assessment in Software Engineering - EASE '14*. New York, New York, USA: ACM  
38  
39 574 Press; 2014. p. 1–10.  
40  
41  
42 575 47. Fletcher RR, Nakeshimana A, Olubeko O. Addressing Fairness, Bias, and Appropriate  
43  
44 576 Use of Artificial Intelligence and Machine Learning in Global Health. *Frontiers in*  
45  
46 577 *Artificial Intelligence*. 2021 Apr 15;3.  
47  
48  
49 578 48. Pot M, Kieusseyan N, Prainsack B. Not all biases are bad: equitable and inequitable biases  
50  
51 579 in machine learning and radiology. *Insights into Imaging*. 2021 Dec 10;12(1):13.  
52  
53  
54 580

## PRISMA-P 2015 Checklist

This checklist has been adapted for use with systematic review protocol submissions to BioMed Central journals from Table 3 in Moher D et al: Preferred reporting items for systematic review and meta-analysis protocols (PRISMA-P) 2015 statement. *Systematic Reviews* 2015 4:1

An Editorial from the Editors-in-Chief of *Systematic Reviews* details why this checklist was adapted - Moher D, Stewart L & Shekelle P: Implementing PRISMA-P: recommendations for prospective authors. *Systematic Reviews* 2016 5:15

| Section/topic                     | #  | Checklist item                                                                                                                                                                                  | Information reported                |                                     | Line number(s) |
|-----------------------------------|----|-------------------------------------------------------------------------------------------------------------------------------------------------------------------------------------------------|-------------------------------------|-------------------------------------|----------------|
|                                   |    |                                                                                                                                                                                                 | Yes                                 | No                                  |                |
| <b>ADMINISTRATIVE INFORMATION</b> |    |                                                                                                                                                                                                 |                                     |                                     |                |
| <b>Title</b>                      |    |                                                                                                                                                                                                 |                                     |                                     |                |
| Identification                    | 1a | Identify the report as a protocol of a systematic review                                                                                                                                        | <input checked="" type="checkbox"/> | <input type="checkbox"/>            | 1              |
| Update                            | 1b | If the protocol is for an update of a previous systematic review, identify as such                                                                                                              | <input type="checkbox"/>            | <input checked="" type="checkbox"/> | N/A            |
| <b>Registration</b>               | 2  | If registered, provide the name of the registry (e.g., PROSPERO) and registration number in the Abstract                                                                                        | <input checked="" type="checkbox"/> | <input type="checkbox"/>            | 61, 195        |
| <b>Authors</b>                    |    |                                                                                                                                                                                                 |                                     |                                     |                |
| Contact                           | 3a | Provide name, institutional affiliation, and e-mail address of all protocol authors; provide physical mailing address of corresponding author                                                   | <input checked="" type="checkbox"/> | <input type="checkbox"/>            | 3-28           |
| Contributions                     | 3b | Describe contributions of protocol authors and identify the guarantor of the review                                                                                                             | <input checked="" type="checkbox"/> | <input type="checkbox"/>            | 427-432        |
| <b>Amendments</b>                 | 4  | If the protocol represents an amendment of a previously completed or published protocol, identify as such and list changes; otherwise, state plan for documenting important protocol amendments | <input type="checkbox"/>            | <input checked="" type="checkbox"/> | N/A            |
| <b>Support</b>                    |    |                                                                                                                                                                                                 |                                     |                                     |                |
| Sources                           | 5a | Indicate sources of financial or other support for the review                                                                                                                                   | <input checked="" type="checkbox"/> | <input type="checkbox"/>            | 438-439        |
| Sponsor                           | 5b | Provide name for the review funder and/or sponsor                                                                                                                                               | <input checked="" type="checkbox"/> | <input type="checkbox"/>            | 438-439        |
| Role of sponsor/funder            | 5c | Describe roles of funder(s), sponsor(s), and/or institution(s), if any, in developing the protocol                                                                                              | <input checked="" type="checkbox"/> | <input type="checkbox"/>            | 438-446        |
| <b>INTRODUCTION</b>               |    |                                                                                                                                                                                                 |                                     |                                     |                |
| <b>Rationale</b>                  | 6  | Describe the rationale for the review in the context of what is already known                                                                                                                   | <input checked="" type="checkbox"/> | <input type="checkbox"/>            | 86-166         |

| Section/topic                             | #   | Checklist item                                                                                                                                                                                                                              | Information reported                |                                     | Line number(s)   |
|-------------------------------------------|-----|---------------------------------------------------------------------------------------------------------------------------------------------------------------------------------------------------------------------------------------------|-------------------------------------|-------------------------------------|------------------|
|                                           |     |                                                                                                                                                                                                                                             | Yes                                 | No                                  |                  |
| <b>Objectives</b>                         | 7   | Provide an explicit statement of the question(s) the review will address with reference to participants, interventions, comparators, and outcomes (PICO)                                                                                    | <input checked="" type="checkbox"/> | <input type="checkbox"/>            | 203-207          |
| <b>METHODS</b>                            |     |                                                                                                                                                                                                                                             |                                     |                                     |                  |
| <b>Eligibility criteria</b>               | 8   | Specify the study characteristics (e.g., PICO, study design, setting, time frame) and report characteristics (e.g., years considered, language, publication status) to be used as criteria for eligibility for the review                   | <input checked="" type="checkbox"/> | <input type="checkbox"/>            | 237-263          |
| <b>Information sources</b>                | 9   | Describe all intended information sources (e.g., electronic databases, contact with study authors, trial registers, or other grey literature sources) with planned dates of coverage                                                        | <input checked="" type="checkbox"/> | <input type="checkbox"/>            | 210-220          |
| <b>Search strategy</b>                    | 10  | Present draft of search strategy to be used for at least one electronic database, including planned limits, such that it could be repeated                                                                                                  | <input checked="" type="checkbox"/> | <input type="checkbox"/>            | 221-226          |
| <b>STUDY RECORDS</b>                      |     |                                                                                                                                                                                                                                             |                                     |                                     |                  |
| Data management                           | 11a | Describe the mechanism(s) that will be used to manage records and data throughout the review                                                                                                                                                | <input checked="" type="checkbox"/> | <input type="checkbox"/>            | 227-229, 268-273 |
| Selection process                         | 11b | State the process that will be used for selecting studies (e.g., two independent reviewers) through each phase of the review (i.e., screening, eligibility, and inclusion in meta-analysis)                                                 | <input checked="" type="checkbox"/> | <input type="checkbox"/>            | 266-278          |
| Data collection process                   | 11c | Describe planned method of extracting data from reports (e.g., piloting forms, done independently, in duplicate), any processes for obtaining and confirming data from investigators                                                        | <input checked="" type="checkbox"/> | <input type="checkbox"/>            | 232-234, 281-287 |
| <b>Data items</b>                         | 12  | List and define all variables for which data will be sought (e.g., PICO items, funding sources), any pre-planned data assumptions and simplifications                                                                                       | <input checked="" type="checkbox"/> | <input type="checkbox"/>            | 288-346          |
| <b>Outcomes and prioritization</b>        | 13  | List and define all outcomes for which data will be sought, including prioritization of main and additional outcomes, with rationale                                                                                                        | <input type="checkbox"/>            | <input checked="" type="checkbox"/> | N/A              |
| <b>Risk of bias in individual studies</b> | 14  | Describe anticipated methods for assessing risk of bias of individual studies, including whether this will be done at the outcome or study level, or both; state how this information will be used in data synthesis                        | <input type="checkbox"/>            | <input checked="" type="checkbox"/> | N/A              |
| <b>DATA</b>                               |     |                                                                                                                                                                                                                                             |                                     |                                     |                  |
| <b>Synthesis</b>                          | 15a | Describe criteria under which study data will be quantitatively synthesized                                                                                                                                                                 | <input checked="" type="checkbox"/> | <input type="checkbox"/>            | 349-357,         |
|                                           | 15b | If data are appropriate for quantitative synthesis, describe planned summary measures, methods of handling data, and methods of combining data from studies, including any planned exploration of consistency (e.g., $I^2$ , Kendall's tau) | <input type="checkbox"/>            | <input checked="" type="checkbox"/> | N/A              |

| Section/topic                            | #   | Checklist item                                                                                                              | Information reported                |                                     | Line number(s) |
|------------------------------------------|-----|-----------------------------------------------------------------------------------------------------------------------------|-------------------------------------|-------------------------------------|----------------|
|                                          |     |                                                                                                                             | Yes                                 | No                                  |                |
|                                          | 15c | Describe any proposed additional analyses (e.g., sensitivity or subgroup analyses, meta-regression)                         | <input type="checkbox"/>            | <input checked="" type="checkbox"/> | N/A            |
|                                          | 15d | If quantitative synthesis is not appropriate, describe the type of summary planned                                          | <input checked="" type="checkbox"/> | <input type="checkbox"/>            | 357-363        |
| <b>Meta-bias(es)</b>                     | 16  | Specify any planned assessment of meta-bias(es) (e.g., publication bias across studies, selective reporting within studies) | <input type="checkbox"/>            | <input checked="" type="checkbox"/> | N/A            |
| <b>Confidence in cumulative evidence</b> | 17  | Describe how the strength of the body of evidence will be assessed (e.g., GRADE)                                            | <input checked="" type="checkbox"/> | <input type="checkbox"/>            | 366-369        |



# BMJ Open

## Automated digital technologies for supporting sepsis prediction in children: A scoping review protocol

|                                 |                                                                                                                                                                                                                                                                                                                                                                                                                                                                                                                                             |
|---------------------------------|---------------------------------------------------------------------------------------------------------------------------------------------------------------------------------------------------------------------------------------------------------------------------------------------------------------------------------------------------------------------------------------------------------------------------------------------------------------------------------------------------------------------------------------------|
| Journal:                        | <i>BMJ Open</i>                                                                                                                                                                                                                                                                                                                                                                                                                                                                                                                             |
| Manuscript ID                   | bmjopen-2022-065429.R1                                                                                                                                                                                                                                                                                                                                                                                                                                                                                                                      |
| Article Type:                   | Protocol                                                                                                                                                                                                                                                                                                                                                                                                                                                                                                                                    |
| Date Submitted by the Author:   | 29-Sep-2022                                                                                                                                                                                                                                                                                                                                                                                                                                                                                                                                 |
| Complete List of Authors:       | Tennant, Ryan; University of Waterloo Faculty of Engineering, Department of Systems Design Engineering<br>Graham, Jennifer; University of Waterloo Faculty of Arts, Department of Psychology<br>Mercer, Kate; University of Waterloo Faculty of Engineering, Department of Systems Design Engineering; University of Waterloo, Library<br>Ansermino, J. Mark; The University of British Columbia, Department of Anesthesiology<br>Burns, Catherine; University of Waterloo Faculty of Engineering, Department of Systems Design Engineering |
| <b>Primary Subject Heading</b>: | Health informatics                                                                                                                                                                                                                                                                                                                                                                                                                                                                                                                          |
| Secondary Subject Heading:      | Paediatrics, Research methods                                                                                                                                                                                                                                                                                                                                                                                                                                                                                                               |
| Keywords:                       | PAEDIATRICS, Health informatics < BIOTECHNOLOGY & BIOINFORMATICS, Information technology < BIOTECHNOLOGY & BIOINFORMATICS, Paediatric intensive & critical care < PAEDIATRICS                                                                                                                                                                                                                                                                                                                                                               |
|                                 |                                                                                                                                                                                                                                                                                                                                                                                                                                                                                                                                             |

SCHOLARONE™  
Manuscripts

1  
2  
3 1 **Automated digital technologies for supporting sepsis prediction in children: A scoping**  
4 **review protocol**  
5 2  
6 3

7  
8 4 **Ryan Tennant, BAsC., MASc. (corresponding author)**  
9

10 5 Department of Systems Design Engineering, Faculty of Engineering, University of Waterloo  
11  
12 6 200 University Avenue West, Waterloo, Ontario, Canada, N2L3G1  
13  
14 7 email: drtennan@uwaterloo.ca  
15

16 8  
17 9 **Jennifer Graham**

18  
19 10 Department of Psychology, University of Waterloo  
20  
21 11 200 University Avenue West, Waterloo, Ontario, Canada, N2L3G1  
22  
23 12 email: j38graham@uwaterloo.ca  
24

25 14 **Kate Mercer, Ph.D.**

26  
27 15 Library, University of Waterloo  
28  
29 16 Department of Systems Design Engineering, Faculty of Engineering, University of Waterloo  
30  
31 17 200 University Avenue West, Waterloo, Ontario, Canada, N2L3G1  
32  
33 18 email: kmercer@uwaterloo.ca  
34

35  
36 20 **J Mark Ansermino, MBBCh.**

37  
38 21 Centre for International Child Health, BC Children's Hospital  
39  
40 22 Department of Anesthesiology, The University of British Columbia  
41  
42 23 950 West 28<sup>th</sup> Avenue, Vancouver, British Columbia, Canada, V5Z4H4  
43  
44 24 email: mansermino@bcchr.ca  
45

46 26 **Catherine M Burns, Ph.D., PEng.**

47  
48 27 Department of Systems Design Engineering, Faculty of Engineering, University of Waterloo  
49  
50 28 200 University Avenue West, Waterloo, Ontario, Canada, N2L3G1  
51  
52 29 email: c4burns@uwaterloo.ca  
53

54  
55 31 **Word Count:** 3223  
56  
57  
58  
59  
60

## 32 **ABSTRACT**

33 **Introduction** While there have been several literature reviews on the performance of digital  
34 sepsis prediction technologies and clinical decision-support algorithms for adults, there remains a  
35 knowledge gap in examining the development of automated technologies for sepsis prediction in  
36 children. This scoping review will critically analyze the current evidence on the design and  
37 performance of automated digital technologies to predict paediatric sepsis, to advance their  
38 development and integration within clinical settings.

39  
40 **Methods and analysis** This scoping review will follow Arksey and O'Malley's framework,  
41 conducted between February to December 2022. We will further develop the protocol using the  
42 Preferred Reporting Items for Systematic Reviews and Meta-Analyses extension for scoping  
43 reviews (PRISMA-ScR). We plan to search the following databases: Association of Computing  
44 Machinery (ACM) Digital Library, Cumulative Index to Nursing and Allied Health Literature  
45 (CINAHL), Embase, Google Scholar, Institute of Electric and Electronic Engineers (IEEE),  
46 PubMed, Scopus, and Web of Science. Studies will be included on children >90 days post-natal  
47 to <21 years old, predicted to have or be at risk of developing sepsis by a digitalized model or  
48 algorithm designed for a clinical setting. Two independent reviewers will complete the abstract  
49 and full-text screening and the data extraction. Thematic analysis will be used to develop  
50 overarching concepts and present the narrative findings with quantitative results and descriptive  
51 statistics displayed in data tables.

52  
53 **Ethics and dissemination** Ethics approval for this scoping review study of the available  
54 literature is not required. We anticipate that the scoping review will identify the current evidence

1  
2  
3 55 and design characteristics of digital prediction technologies for the timely and accurate  
4  
5 56 prediction of paediatric sepsis and factors influencing clinical integration. We plan to  
6  
7 57 disseminate the preliminary findings from this review at national and international research  
8  
9 58 conferences in global and digital health, gathering critical feedback from multi-disciplinary  
10  
11 59 stakeholders.  
12  
13  
14  
15  
16

### 17 61 **Scoping review registration**

18  
19 62 [https://osf.io/nh6qz/?view\\_only=8c840412a2a44117ac16fdf76e06abd6](https://osf.io/nh6qz/?view_only=8c840412a2a44117ac16fdf76e06abd6)  
20  
21  
22  
23

### 24 64 **Strengths and limitations of this study**

- 25  
26 65 • This review is a rigorous approach to collectively synthesizing current research on  
27  
28 66 automated paediatric sepsis prediction technologies, critically examining the relationships  
29  
30 67 between their design, performance, and clinical integration to identify sociotechnical  
31  
32 68 challenges and research gaps.  
33  
34  
35 69 • The chosen review strategy will comprehensively evaluate the vast literature across  
36  
37 70 various study types and research disciplines by a multi-disciplinary research team.  
38  
39  
40 71 • The review will exclude digital prediction technologies for paediatric sepsis treatment  
41  
42 72 decisions and is limited to peer-reviewed literature written in the English language with a  
43  
44 73 full-text version available.  
45  
46  
47 74 • Articles focusing on age cohorts <90 days post-natal or >21 years old will be excluded  
48  
49 75 due to significant differences in sepsis etiology and clinical presentation.  
50  
51  
52  
53  
54  
55  
56  
57  
58  
59  
60

## 76 INTRODUCTION

77 Globally, it is estimated there were a total of 25.2 million cases of sepsis in children (<19) in  
 78 2017, imposing significant health care and societal burden (1). Healthcare costs for severe  
 79 paediatric sepsis hospitalizations reached approximately \$7.31 billion in the United States in  
 80 2016, accounting for almost 20% of total paediatric hospitalization costs (2). However, about  
 81 85% of global sepsis cases and 84.5% of sepsis-related deaths among all age groups occur in  
 82 low-middle income countries, specifically those in sub-Saharan Africa and South-East Asia (1).  
 83 Annual global mortality rates for children (<5) are approximately 2.9 million (Table 1) (3).

84  
 85 Table 1. Differences between global neonatal, paediatric, and adult sepsis (3).

|                             | Neonatal (<90 days) | Paediatric (<5 y/o) | Adult (>20 y/o) |
|-----------------------------|---------------------|---------------------|-----------------|
| <b>Annual Cases (M)</b>     | 1.3 – 3.9           | 20.3                | 23.7            |
| <b>Annual Mortality (M)</b> | 0.4 – 0.7           | 2.9                 | 7.7             |

86  
 87 Early recognition of sepsis in children is challenging. Unlike adult sepsis, children have  
 88 different sepsis aetiologies (3). For example, children commonly develop sepsis from  
 89 pneumonia, diarrhea, meningitis, or viral infections, where abdominal or genitourinary sources  
 90 are more common in adults (4). Differences in aetiology can also be found between childhood  
 91 and neonatal sepsis, with early-onset neonatal sepsis having a distinct microbial pattern (5).  
 92 Recognizing sepsis in children is also significantly more challenging due to maturation-based  
 93 differences in physiology (including immune system response), limitations in the communication  
 94 of symptoms, and diagnostic modalities (4,6,7). Sepsis can lead to life-altering organ dysfunction  
 95 if not identified quickly in children (8), where mortality rates are reduced two-fold if treated  
 96 within the first hour (4). Recognition of sepsis is confounded by the age-based symptom  
 97 variations within children, such as their differences in blood pressure response, serum lactate

1  
2  
3 98 levels (4), and commonalities among other childhood conditions and syndromes like Kawasaki  
4  
5 99 syndrome or bronchiolitis (9). This milieu of complex information combined with significant  
6  
7  
8 100 time pressure provides a significant cognitive burden for healthcare professionals to promptly  
9  
10 101 identify the onset of deterioration that can lead to this serious medical condition.

12 102 In 2020, updated Paediatric Sepsis Survival guidelines were published calling for the  
13  
14 103 integration of screening standards in healthcare facilities to support rapid identification of sepsis  
15  
16 104 in children (10) and provide the appropriate antimicrobial therapy at the proper time (5,10).  
17  
18 105 Established screening tools such as the Paediatric Early Warning Score (PEWS) may support the  
19  
20 106 timeliness of detecting clinical deterioration in children that can lead to sepsis (11). Recently,  
21  
22 107 adaptations to the Sequential Organ Assessment Score (SOFA) for paediatric patients (pSOFA)  
23  
24 108 and neonates (nSOFA) have shown promise in identifying children at risk for mortality with  
25  
26 109 sepsis (12); however, it is controversial whether these scores provide value in low-resource  
27  
28 110 environments (13–15). Development and implementation of algorithms such as the Sepsis  
29  
30 111 Prediction and Optimization Therapy (SPOT) that can analyze electronic health data in real-time  
31  
32 112 to provide a rule-based approach to initiate a physical sepsis screen have also been reported (16).  
33  
34 113 With the call from the World Health Organization to improve sepsis identification and the  
35  
36 114 potential for data-driven and knowledge-based technologies (3,17), digital prediction  
37  
38 115 technologies are becoming more advanced using mathematical, statistical, and machine learning  
39  
40 116 techniques to support sepsis prediction utilizing clinical information, symptoms, biomarkers, and  
41  
42 117 other signs at the bedside (18–21). While recent reviews have explored the literature on the  
43  
44 118 effectiveness of digital technologies for adult and neonate sepsis prediction (18,19,22–26), there  
45  
46 119 is currently no review on the design and implementation of these predictive technologies for  
47  
48 120 children. Considering the pathophysiology and aetiology for paediatric sepsis are different from  
49  
50  
51  
52  
53  
54  
55  
56  
57  
58  
59  
60

1  
2  
3 121 that seen in adults and neonates (27), combined with the lack of widely accessible digital  
4  
5 122 technologies for children compared to adults (28), it is critically important to review the  
6  
7  
8 123 literature on this age cohort.  
9

10 124

### 12 125 **Prior reviews on sepsis prediction technologies**

14  
15 126 Recent narrative reviews discuss machine learning-based technologies for adult and paediatric  
16  
17 127 sepsis (20,29,30). However, their eligibility criteria focus primarily on adults, with only two (20)  
18  
19 128 or three (29) articles on children. Some reviews excluded digital technologies that were not  
20  
21 129 based on “modern” machine learning models (21,30), or involved a broad search on infectious  
22  
23 130 disease prediction beyond sepsis (29). Others have also limited their investigations to  
24  
25  
26 131 PubMed/Medline, excluding engineering databases, which may provide greater insight into the  
27  
28 132 design characteristics of digital technologies (20,26,31–33), or they focus exclusively on US  
29  
30  
31 133 hospitals (33).  
32

33 134 Many systematic and scoping reviews have been rigorous in their search strategy but  
34  
35 135 similar to the identified narrative reviews, report on screening tools and technologies for adult  
36  
37 136 patients while excluding children (24,25,28,34–37), and the engineering disciplines (19,23,38–  
38  
39 137 40). Currently published protocols plan to exclude literature on the application of machine  
40  
41  
42 138 learning (39,41), which may not capture research on certain relevant technologies. While there  
43  
44  
45 139 have been systematic reviews on the performance of neonatal sepsis prediction and recognition  
46  
47 140 technologies providing insight into their capabilities (19,23), none focus on the specifics of  
48  
49 141 paediatric sepsis.  
50

51 142 Current systematic reviews that include the paediatric literature as part of their search  
52  
53  
54 143 strategy are not strictly focused on this patient population (22,28,38), having only identified one  
55  
56  
57  
58  
59  
60

1  
2  
3 144 (38) or three (22,28) related articles specific to children. Other reviews broadly examine early  
4  
5 145 warning systems for paediatric clinical deterioration (42,43). We have not identified any  
6  
7  
8 146 systematic or scoping reviews that accurately scope the literature on digital paediatric sepsis  
9  
10 147 prediction technology. While one identified protocol aims to capture strategies for early  
11  
12 148 recognition of paediatric sepsis from clinical deterioration, the focus of the review is general  
13  
14  
15 149 strategy effectiveness and does not explicitly include engineering databases which would  
16  
17 150 describe technical design aspects (40).  
18

19 151

## 21 152 **Purpose of the study**

23  
24 153 Given the limitations of recent literature reviews and the lack of reviews focused on paediatric  
25  
26 154 sepsis, it is necessary to synthesize the current research describing the development and  
27  
28 155 evaluation of automated sepsis prediction technologies for this underrepresented age cohort. The  
29  
30 156 scoping review defined by this protocol will identify and summarize the existing literature on the  
31  
32  
33 157 design characteristics, performance, and integration of automated sepsis prediction technologies  
34  
35 158 in paediatric contexts. The scoping review, a methodology focusing on answering broader  
36  
37  
38 159 research questions through a systematic search and presenting tabular findings along with a  
39  
40 160 narrative integration (44), was identified as the best approach for this study. We anticipate that  
41  
42 161 the rigorous methodology will warrant a meaningful summary about the current development of  
43  
44  
45 162 digital technologies for sepsis prediction that can inform future research toward improving their  
46  
47 163 performance and evidence-based clinical implementation to ultimately improve the lives of  
48  
49 164 children globally.  
50

51 165

## 54 166 **METHODS AND ANALYSIS**



1  
2  
3 167 The reviewers on this scoping review consist of a multi-disciplinary team of engineers, a health  
4  
5 168 researcher/biomedical engineering research librarian, a psychology student, and a paediatric  
6  
7 169 clinician. Our methodology will be guided by the framework developed by Arksey and O'Mally  
8  
9  
10 170 (44), which iterates through six steps: (i) identifying the research questions; (ii) searching for  
11  
12 171 relevant studies; (iii) selecting the studies; (iv) charting the data; (v) collating, summarizing, and  
13  
14 172 reporting the results; and (vi) consulting with stakeholders to inform or validate findings. The  
15  
16 173 sixth step is optional, and we will modify this step to consult with experts specifically around  
17  
18 174 finding technologies used in hospital or industry settings. Levac's recommendations for  
19  
20 175 independent full-text reviews by at least two reviewers will also be followed (45). This study  
21  
22 176 protocol will follow the Preferred Reporting Items for Systematic Reviews and Meta-Analyses  
23  
24 177 extension for a scoping review (PRISMA-ScR) (46) with any gaps being filled by the Preferred  
25  
26 178 Reporting Items for Systematic Reviews and Meta-Analyses extension for protocols (PRISMA-  
27  
28 179 P) [see Additional file 1]. This protocol has been registered on the Open Science Framework  
29  
30  
31 180 ([https://osf.io/nh6qz/?view\\_only=8c840412a2a44117ac16fdf76e06abd6](https://osf.io/nh6qz/?view_only=8c840412a2a44117ac16fdf76e06abd6)).  
32  
33  
34  
35  
36  
37

### 38 **Step 1: identifying the research questions**

39  
40 183 The research questions were developed through an initial search of the literature on automated  
41  
42 184 digital technologies for paediatric sepsis recognition and gaps identified in current systematic  
43  
44 185 and narrative reviews in the neonatal and adult context. The Joanna Briggs Institute  
45  
46 186 recommendations of the Population, Concept, and Context model were followed (47),  
47  
48 187 maintaining a broad scope for understanding the existing evidence on paediatric sepsis prediction  
49  
50 188 technologies with respect to their current performance, identified outcome measures, and  
51  
52  
53 189 existing research gaps:  
54  
55  
56  
57  
58  
59  
60

- 1  
2  
3 190 1. How do the design characteristics of automated paediatric sepsis prediction technologies  
4  
5 191 for healthcare facilities (e.g., the recognition task, type, method, demographics, and  
6  
7 192 indicators) influence their performance?  
8  
9  
10 193 2. What are the impacts of clinically implemented automated paediatric sepsis prediction  
11  
12 194 technologies on decision-making and patient outcome measures?  
13  
14 195 3. What challenges and research gaps (e.g., evidence, practical knowledge, population,  
15  
16 196 theoretical, methodological) exist for improving the sociotechnical integration of  
17  
18 197 knowledge-based algorithms and data-driven models for predicting paediatric sepsis in  
19  
20 198 healthcare facilities?  
21  
22  
23  
24 199

25  
26 200 **Step 2: identifying relevant studies**

27  
28 201 We will conduct a comprehensive scoping review that includes a multi-disciplinary group of  
29  
30 202 scholarly databases: Association of Computing Machinery (ACM) Digital Library, Cumulative  
31  
32 203 Index to Nursing and Allied Health Literature (CINAHL), Embase, Google Scholar, Institute of  
33  
34 204 Electric and Electronic Engineers (IEEE), PubMed, Scopus, and Web of Science. Articles will  
35  
36 205 further be identified using the snowballing technique (48), to identify relevant literature among  
37  
38 206 the references and citations of articles included for the full review. We will also hand-search for  
39  
40 207 reports on the design, validation, and implementation of commercial digital technologies for  
41  
42 208 sepsis prediction, which may be approved by governing bodies such as Health Canada (health-  
43  
44 209 products.canada.ca/mdall-limh/), the Food and Drug Administration  
45  
46 210 ([accessdata.fda.gov/scripts/cdrh/cfdocs/cfrl/textsearch.cfm](http://accessdata.fda.gov/scripts/cdrh/cfdocs/cfrl/textsearch.cfm)), and the European Union Medical  
47  
48 211 Device Regulation ([ec.europa.eu/tools/eudamed/#/screen/home](http://ec.europa.eu/tools/eudamed/#/screen/home)).

212 Guided by a University of Waterloo biomedical engineering research librarian, we  
 213 developed a comprehensive search strategy for each database. The approach employs keywords,  
 214 medical subject headings (MeSH), key concept subject headings, and Boolean terms broken  
 215 down into the following parts: the recognition algorithm or model, type of digital technology,  
 216 health condition, alert type, implementation or validation factors, and patient population. A  
 217 sample search strategy for PubMed is presented in Table 2.

218 Table 2. Sample search strategy and results.

| Database      | Search Terms                                                                                                                                                                                                                                                                                                                                                                                                                                                                                                                                                                                                                                                                                                                                                                                                                                                                                                                                                                                                                                                                                                                                                                                                                                                                                                                                                                                                                                                                                                                                                                                                                                                                                          | Results | Date       |
|---------------|-------------------------------------------------------------------------------------------------------------------------------------------------------------------------------------------------------------------------------------------------------------------------------------------------------------------------------------------------------------------------------------------------------------------------------------------------------------------------------------------------------------------------------------------------------------------------------------------------------------------------------------------------------------------------------------------------------------------------------------------------------------------------------------------------------------------------------------------------------------------------------------------------------------------------------------------------------------------------------------------------------------------------------------------------------------------------------------------------------------------------------------------------------------------------------------------------------------------------------------------------------------------------------------------------------------------------------------------------------------------------------------------------------------------------------------------------------------------------------------------------------------------------------------------------------------------------------------------------------------------------------------------------------------------------------------------------------|---------|------------|
| <b>PubMed</b> | ("decision support"[All Fields] OR "decision-support"[All Fields] OR "early warning score"[MeSH Terms] OR "early warning score"[All Fields] OR "smart system*"[All Fields] OR "electronic alert*"[All Fields] OR "artificial intelligence"[All Fields] OR "artificial intelligence"[MeSH Terms] "machine learning"[All Fields] OR "deep learning"[All Fields] OR "neural network*"[All Fields] OR "support vector machine"[All Fields] OR "hidden markov model"[All Fields] OR "statistical learning"[All Fields] OR "predictive function"[All Fields] OR "algorithm"[All Fields] OR "algorithms"[MeSH Terms] OR "automat*"[All Fields] OR "comput*"[All Fields] OR "decision making, computer assisted"[MeSH Terms] OR "electronic*"[All Fields] OR "representation learning"[All Fields] OR "conformal prediction"[All Fields] OR "random forest"[All Fields] OR "naïve bayes"[All Fields] OR "regression" OR "regression analysis"[MeSH Terms] OR "gradient boosting"[All Fields] OR "artificial learning"[All Fields] OR "machine intelligence"[All Fields] OR "probabilistic network*"[All Fields] OR "knowledge representation"[All Fields] OR "bayesian learning"[All Fields] OR "expert system*"[All Fields] OR "technology assisted"[All Fields] OR "computer assisted"[All Fields] OR "statistical"[All Fields] OR "mathematical"[All Fields]) AND ("system"[All Fields] OR "tool"[All Fields] OR "alert*"[All Fields] OR "technology"[All Fields] OR "software"[All Fields] OR "model*"[All Fields] OR "engine"[All Fields] OR "approach*"[All Fields] OR "algorithm"[All Fields] OR "platform"[All Fields] OR "method*"[All Fields] OR "scor*"[All Fields] OR "device"[All Fields]) AND ( | 15,531  | 02/15/2022 |

---

"sepsis"[All Fields] OR "sepsis"[MeSH Terms] OR "septic shock"[All Fields] OR "systemic inflammatory response syndrome"[All Fields] OR "acute deterioration"[All Fields] OR "patient deterioration"[All Fields] OR "clinical deterioration"[MeSH Terms] OR "clinical deterioration"[All Fields] OR "severe infection"[All Fields] OR "severe bacterial infection"[All Fields] OR "bacterial infections"[MeSH Terms] OR "febrile illness"[All Fields] OR "non-malarial febrile illness"[All Fields] OR "bacteremia"[All Fields]) AND ( "diagnos\*"[All Fields] OR "detect\*"[All Fields] OR "predict\*"[All Fields] OR "prognosticate"[All Fields] OR "identif\*"[All Fields] OR "infer\*"[All Fields] OR "warn\*"[All Fields] OR "alert\*"[All Fields] OR "recog\*"[All Fields] OR "screen\*"[All Fields] OR "monitor\*"[All Fields] OR "assess\*"[All Fields] OR "surveillance"[All Fields] OR "classif\*"[All Fields] ) AND ( "evaluat\*"[All Fields] OR "implement\*"[All Fields] OR "perform\*"[All Fields] OR "design"[All Fields] OR "validat\*"[All Fields] OR "usability"[All Fields] OR "effectiveness"[All Fields] OR "efficiency"[All Fields] OR "satisfaction"[All Fields] OR "safety"[All Fields] OR "acceptance"[All Fields] OR "clinical value"[All Fields] OR "interpret\*"[All Fields] OR "perception"[All Fields] OR "perspective"[All Fields] OR "opinion"[All Fields] OR "error"[All Fields] ) AND ( "child\*"[All Fields] OR "paediatric"[All Fields] OR "pediatric"[All Fields] OR "pediatrics"[MeSH Terms] OR "toddler\*"[All Fields] OR "teen\*"[All Fields] OR "youth\*"[All Fields] OR "adolescenc\*"[All Fields] OR "adolescent"[MeSH Terms] OR "infan\*"[All Fields] OR "infant"[MeSH Terms] OR "school age\*"[All Fields] OR "PICU"[All Fields] ) LIMIT TO: [Text Availability]: Full text, [Language]: English, [Species]: Human

---

219  
 220 The search results will be imported to Mendeley's reference management software for  
 221 future referencing and organization (Mendeley Ltd.). A systematic review management software,  
 222 Covidence (Veritas Health Innovation Ltd.), will be used to identify and merge duplicate articles.  
 223 A sample of 20 abstracts will be initially screened by two reviewers (RT and JG), ensuring the  
 224 inclusion-exclusion requirements are robust in capturing relevant articles related to the design  
 225 and evaluation of automated prediction technologies for paediatric sepsis. Both reviewers will

226 also ensure that the data extraction items capture valuable and appropriate study details from the  
227 articles included in the full-text review, which will be shared with the research team.

228

### 229 **Step 3: study selection**

#### 230 *Inclusion criteria*

231 The proposed review will include articles that meet the following inclusion criteria:

- 232 • The article is about an automated data-driven or knowledge-based approach toward  
233 paediatric sepsis prediction in a healthcare setting, including sepsis, severe sepsis, and  
234 septic shock.
- 235 • The digital technology is evaluated for its performance through validation testing,  
236 experiments, or an observational study.
- 237 • Following the American Academy of Pediatrics' definition for late adolescence, more  
238 than the majority of data reported will include children aged >90 days post-natal to <21  
239 years old (49).
- 240 • The article is written in English.
- 241 • The article is a peer-reviewed journal article, full conference proceeding, or research  
242 published on a commercially available digital technology which may be approved by a  
243 medical device regulatory body.
- 244 • There is no specification for publication years.

245

#### 246 *Exclusion Criteria*

247 Screened articles that fit within the following categories will be excluded from this review:

248 Commentaries, dissertations, editorials, books and book chapters, lectures and addresses, study

1  
2  
3 249 protocols, review articles, and articles inaccessible for full-text review after utilizing library  
4  
5 250 resources. Cohort studies where paediatric sepsis has already been clinically identified, such as  
6  
7  
8 251 articles describing prediction technologies for subsequent sepsis treatment or mortality risk, are  
9  
10 252 outside the scope of this review if predicting sepsis, severe sepsis or septic shock is not a facet of  
11  
12 253 the technology. Also, digital technologies developed for at-home use are also outside the scope  
13  
14  
15 254 of this review, as the context of the protocol is to review the evidence on automated sepsis  
16  
17 255 prediction technologies in regulated healthcare settings.  
18  
19  
20 256

### 21 257 *Selection process*

22  
23  
24 258 This review will follow the reporting checklist in the Preferred Reporting Items for Systematic  
25  
26 259 reviews and Meta-Analyses extension for Scoping Reviews (PRISMA-ScR), provided by Tricco  
27  
28 260 et al. (46). First, all relevant articles will be imported into Covidence. Second, two reviewers (RT  
29  
30  
31 261 and JG) will independently perform the title and abstract screening using the developed  
32  
33 262 eligibility criteria by classifying them as “Yes,” “No,” or “Maybe.” Any article classified as  
34  
35 263 “Yes” or “Maybe” by RT or JG will be included in the full-text review during this stage by  
36  
37  
38 264 adding them to an Excel spreadsheet for access by all authors. If a full-text article cannot be  
39  
40 265 accessed, the reviewers will seek assistance from library services at the institution or directly  
41  
42 266 contact the article’s corresponding author. Third, two investigators (RT and JG) will  
43  
44  
45 267 independently perform the full-text screening for eligibility using the listed inclusion-exclusion  
46  
47 268 criteria. A third member of the research team will resolve any disagreements on eligibility that  
48  
49 269 occur during the full-text review. After the full-text review, an inter-rater agreement will be  
50  
51 270 calculated using Cohen’s kappa coefficient ( $\kappa$ ) statistic.  
52  
53  
54  
55  
56  
57  
58  
59  
60

1  
2  
3 271 The first step in identifying relevant studies was performed on February 15, 2022. The  
4  
5 272 planned end date for completing the full-text screening and analysis is December 30<sup>th</sup>, 2022. We  
6  
7  
8 273 have maintained search alerts for potentially eligible articles to ensure our review remains  
9  
10 274 updated before dissemination through publication.  
11

12 275

#### 14 276 **Step 4: charting the data**

16  
17 277 The data extraction form will be developed in Covidence and exported to Excel to capture the  
18  
19 278 relevant information from each article. Two reviewers (RT, JG) will individually extract the  
20  
21 279 relevant data from a sample of eligible articles screened for inclusion in the full-text review to  
22  
23 280 ensure consistency of recording data. Any disagreements on extracted data will be resolved  
24  
25 281 through discussion between the reviewers. The form will be iteratively updated until the authors  
26  
27 282 reach a consensus on the relevant data to extract. We will begin by pulling the following type of  
28  
29  
30 283 data into the form, with additional data included as we screen more articles:

- 31  
32  
33 284 • Article information: author(s), year published, city, country, discipline(s).  
34  
35 285 • Prediction task: the definition of sepsis being identified and the use context for  
36  
37 286 recognition in paediatrics.  
38  
39  
40 287 • Prediction task type:  
41  
42 288 ○ Alerting automation that provides a notification that a patient has met the  
43  
44 289 objective sepsis recognition criteria.  
45  
46 290 ○ Decision support automation that provides assistance in the diagnosis of sepsis.  
47  
48 291 ○ Data automation that collects clinically relevant cues and information on behalf of  
49  
50 292 the user(s), which may be used in combination with alerting and decision support.  
51  
52  
53 293 • Prediction method:

- 294 ○ Data-driven methods that use retrospective datasets to build a statistical or
- 295 machine learning-based model.
- 296 ○ Knowledge-based methods that use consensus criteria to build an algorithm with
- 297 threshold-based criteria.
- 298 ● Participant demographics: age cohort, number of participants.
- 299 ● Prediction indicators: vital signs, biomarkers, socio-demographics, treatment, medical
- 300 history.
- 301 ● Prediction interface: audible alert, dialog box, provided information
- 302 ● Validation measures:
  - 303 ○ Reported number of true positives, false positives, and false negatives.
  - 304 ○ Reported sensitivity and specificity.
  - 305 ○ Time to accurate sepsis recognition by the technology and/or the clinician.
  - 306 ○ Measured or expected impact on clinical decisions and patient outcomes.
  - 307 ○ Generalizability of the digital technology in the context of bias, fairness, and
  - 308 appropriateness (50,51).

### 310 **Step 5: collating, summarizing, and reporting the results**

311 The extracted data will be synthesized within tables that summarize the current digital  
312 technology landscape in predicting paediatric sepsis, including characteristics that describe their  
313 performance and the sociotechnical factors of their integration by health care providers on  
314 patient outcomes. Within summary tables, we will present the current approaches toward model  
315 and algorithm development for automated sepsis prediction technologies, including the  
316 predictive indicators, the prediction timing objective, and how they interface with clinicians.



1  
2  
3 317 Quantitative performance and implementation measures such as sensitivity and specificity, and  
4  
5 318 the impacts on intervention timing will also be reported in data tables, including calculations of  
6  
7 319 precision, recall, and F1 score, when possible.  
8  
9

10 320 We will then perform a thematic analysis to identify concepts related to our research  
11  
12 321 questions. This analysis will be presented as a narrative, including an organization of themes on  
13  
14 322 the identified design characteristics of automated prediction technologies integrated within  
15  
16 323 clinical contexts. The purpose of the analysis will be to identify the types of research gaps that  
17  
18 324 exist for knowledge-based algorithms and data-driven models to improve sociotechnical  
19  
20 325 integration (i.e., supporting clinical decision-making) and patient outcomes. Challenges with  
21  
22 326 bias, fairness, and appropriateness will also be qualitatively examined with respect to potential  
23  
24 327 generalizability barriers. Diagrams will be developed for the identified relationships and themes  
25  
26 328 among the design characteristics of the automated technologies for paediatric sepsis prediction  
27  
28 329 and their influence on system performance and implementation throughout time to visually  
29  
30 330 highlight the opportunities for future investigations.  
31  
32  
33  
34

35 331

### 36 332 **Step 6: methodological quality appraisal**

37  
38 333 We will consult with experts in automated paediatric sepsis prediction technologies for this  
39  
40 334 review to identify those applied in clinical settings. While critical appraisal of the identified  
41  
42 335 articles is not mandatory in the scoping review methodology, we will consult with stakeholders  
43  
44 336 to inform and validate our findings.  
45  
46  
47  
48

49 337

### 50 338 **Patient and public involvement**

51  
52 339 There were no patients or public involvement in the development of this protocol.  
53  
54  
55  
56  
57  
58

340

**341 ETHICS AND DISSEMINATION**

342 Approval from an ethics review committee is not required for this study because it is a scoping  
343 review of previously published literature. Once the review is completed, we plan to disseminate  
344 the preliminary findings at national and international research conferences in global and digital  
345 health to gather critical feedback from researchers and the public. The finalized results from the  
346 review will be submitted for publication in an open access peer-reviewed journal.

347

**348 DISCUSSION**

349 This scoping review will provide a comprehensive and structured understanding of the  
350 automated digital technologies that have been developed to support the timely prediction of  
351 paediatric sepsis. At a high-level, the results will focus on design characteristics, performance  
352 validation, and current sociotechnical integration factors, which will be analyzed thematically  
353 and reported in data summary tables, indicating how the development of these technologies is  
354 evolving throughout time. It is anticipated that the outcomes will reveal the current challenges in  
355 developing and implementing clinically meaningful digital prediction technologies for paediatric  
356 sepsis across various clinical environments. Furthermore, the results are expected to identify  
357 critical research aspects requiring further investigation.

358 Compared to previous articles, this scoping review focuses on the complexities of  
359 paediatric sepsis, with a methodological strength in taking a comprehensive and systematic  
360 approach that will provide an overview of the evidence in this digital technology landscape.  
361 Inherent in the approach of a scoping review is the limitation of its objective: to summarize the  
362 literature and identify meaningful gaps for further research. As this study will include articles

1  
2  
3 363 with various study designs, it does not aim to answer specific questions about recommending the  
4  
5 364 use or application of certain sepsis prediction technologies for paediatrics. With the results of the  
6  
7 365 pilot search (Table 2), this review is also limited in its scope, where non-English articles or  
8  
9 366 articles without a full-text version will not be included. Finally, digital technologies informing  
10  
11 367 treatment strategies for sepsis and studies looking at age cohorts <90 days post-natal or >21  
12  
13 368 years old will be excluded because of significant differences in sepsis etiology and clinical  
14  
15 369 presentation, while capturing literature from geographic areas that provide paediatric healthcare  
16  
17 370 services to this age range. We plan to adequately convey the overall strengths and limitations  
18  
19 371 once the full-text review is completed, including any deviations from the protocol, in the final  
20  
21 372 review.  
22  
23  
24  
25

26 373 In conclusion, by mapping the attributes of paediatric sepsis prediction technologies to  
27  
28 374 outcomes related to clinical integration and performance, we anticipate that our results will  
29  
30 375 highlight critical research gaps among the medical, engineering, and computer science  
31  
32 376 disciplines. The results may inform research on identifying relevant predictive indicators best  
33  
34 377 suited for the design of digital technologies in specific use contexts and environments,  
35  
36 378 improvements towards model development for sepsis prediction, and factors supporting the  
37  
38 379 optimal workflow integration of digital prediction systems by clinicians. Ultimately, this review  
39  
40 380 will be critical for advancing knowledge to improve sepsis prediction for children globally.  
41  
42  
43  
44

45 381

### 46 382 **List of abbreviations**

47 383 ACM: Association of Computing Machinery

48  
49 384 CINAHL: Cumulative Index to Nursing and Allied Health Literature

50  
51 385 IEEE: Institute of Electric and Electronic Engineers  
52  
53  
54  
55  
56  
57  
58  
59  
60

1  
2  
3 386 nSOFA: neonatal Sequential Organ Assessment Score

4  
5 387 PEWS: Paediatric Early Warning Score

6  
7 388 PRISMA-P: Preferred Reporting Items for Systematic Review and Meta-Analysis extension for

8  
9 389 protocols

10  
11 390 PRISMA-ScR: Preferred Reporting Items for Systematic Review and Meta-Analysis extension

12  
13 391 for scoping reviews

14  
15 392 pSOFA: paediatric Sequential Organ Assessment Score

16  
17 393 SOFA: Sequential Organ Assessment Score

18  
19 394 SPOT: Sepsis Prediction and Optimization Therapy

20  
21 395

22  
23  
24  
25  
26 396 **Author contributions**

27  
28 397 RT, JG, KM, CMB, and JMA contributed to the development of this manuscript. RT is the

29  
30 398 guarantor of the review, conceptualized the research questions and methods, and drafted the

31  
32 399 initial manuscript. All authors contributed to the development of the search strategy, selection

33  
34 400 criteria, and data extraction template. JMA provided expertise on paediatric sepsis and search

35  
36 401 terms. All authors critically reviewed the protocol for intellectual content, subsequently revised it

37  
38 402 for publication, and read and approved the final version for submission.

39  
40 403

41  
42  
43  
44 404 **Availability of data and materials**

45  
46 405 Not applicable.

47  
48 406

49  
50  
51 407 **Funding statement**

52  
53 408 Not applicable.

1  
2  
3 409  
4

5 410 **Competing interests statement**  
6

7  
8 411 The authors declare that they have no competing interests.  
9

10 412  
11

12 413 **Acknowledgements**  
13

14 414 RT is supported by an Engineering Excellence Doctoral Fellowship from the University of  
15

16  
17 415 Waterloo Faculty of Engineering.  
18  
19  
20  
21  
22  
23  
24  
25  
26  
27  
28  
29  
30  
31  
32  
33  
34  
35  
36  
37  
38  
39  
40  
41  
42  
43  
44  
45  
46  
47  
48  
49  
50  
51  
52  
53  
54  
55  
56  
57  
58  
59  
60

## 416 **References**

- 417 1. Rudd KE, Johnson SC, Agesa KM, Shackelford KA, Tsoi D, Kievlan DR, et al. Global,  
418 regional, and national sepsis incidence and mortality, 1990–2017: analysis for the Global  
419 Burden of Disease Study. *The Lancet*. 2020 Jan;395(10219):200–11.
- 420 2. Carlton EF, Barbaro RP, Iwashyna T “Jack”, Prescott HC. Cost of Pediatric Severe Sepsis  
421 Hospitalizations. *JAMA Pediatr*. 2019 Oct 1;173(10):986.
- 422 3. World Health Organization. Global report on epidemiology and burden of sepsis: current  
423 evidence, identifying gaps and future directions [Internet]. Geneva; 2020 [cited 2022 Jan  
424 25]. Available from: <https://apps.who.int/iris/handle/10665/334216>
- 425 4. Emr BM, Alcamo AM, Carcillo JA, Aneja RK, Mollen KP. Pediatric Sepsis Update: How  
426 Are Children Different? *Surg Infect (Larchmt)*. 2018 Feb;19(2):176–83.
- 427 5. Aneja RK, Varughese-Aneja R, Vetterly CG, Carcillo JA. Antibiotic Therapy in Neonatal  
428 and Pediatric Septic Shock. *Curr Infect Dis Rep*. 2011 Oct 6;13(5):433–41.
- 429 6. Peshimam N, Nadel S. Sepsis in children: state-of-the-art treatment. *Ther Adv Infect Dis*.  
430 2021 Jan 23;8:204993612110553.
- 431 7. Davis AL, Carcillo JA, Aneja RK, Deymann AJ, Lin JC, Nguyen TC, et al. American  
432 College of Critical Care Medicine Clinical Practice Parameters for Hemodynamic Support  
433 of Pediatric and Neonatal Septic Shock. *Crit Care Med*. 2017 Jun;45(6):1061–93.
- 434 8. Peshimam N, Nadel S. Sepsis in children: state-of-the-art treatment. *Ther Adv Infect Dis*.  
435 2021 Jan 23;8:204993612110553.
- 436 9. Cox MI, Voss H. Improving sepsis recognition and management. *Curr Probl Pediatr  
437 Adolesc Health Care*. 2021 Apr;51(4):101001.

- 1  
2  
3 438 10. Cotten CM. Antibiotic Stewardship. *Clin Perinatol* [Internet]. 2015 Mar;42(1):195–206.  
4  
5 439 Available from: <https://linkinghub.elsevier.com/retrieve/pii/S009551081400116X>  
6  
7  
8 440 11. Lambert V, Matthews A, MacDonell R, Fitzsimons J. Paediatric early warning systems for  
9  
10 441 detecting and responding to clinical deterioration in children: a systematic review. *BMJ*  
11  
12 442 *Open*. 2017 Mar 13;7(3):e014497.  
13  
14  
15 443 12. Humoodi MO, Aldabbagh MA, Salem MM, al Talhi YM, Osman SM, Bakhsh M, et al.  
16  
17 444 Epidemiology of pediatric sepsis in the pediatric intensive care unit of king Abdulaziz  
18  
19 445 Medical City, Jeddah, Saudi Arabia. *BMC Pediatr*. 2021 Dec 7;21(1):222.  
20  
21  
22 446 13. Wynn JL, Polin RA. A neonatal sequential organ failure assessment score predicts  
23  
24 447 mortality to late-onset sepsis in preterm very low birth weight infants. *Pediatr Res*. 2020  
25  
26 448 Jul 1;88(1):85–90.  
27  
28  
29 449 14. Schlapbach LJ, Straney L, Bellomo R, MacLaren G, Pilcher D. Prognostic accuracy of  
30  
31 450 age-adapted SOFA, SIRS, PELOD-2, and qSOFA for in-hospital mortality among  
32  
33 451 children with suspected infection admitted to the intensive care unit. *Intensive Care Med*.  
34  
35 452 2018 Feb 19;44(2):179–88.  
36  
37  
38 453 15. Matics TJ, Sanchez-Pinto LN. Adaptation and Validation of a Pediatric Sequential Organ  
39  
40 454 Failure Assessment Score and Evaluation of the Sepsis-3 Definitions in Critically Ill  
41  
42 455 Children. *JAMA Pediatr*. 2017 Oct 2;171(10):e172352.  
43  
44  
45 456 16. Perlin JB, Jackson E, Hall C, Mindick A, Berberich G, Korwek K, et al. 2019 John M.  
46  
47 457 Eisenberg Patient Safety and Quality Awards: SPOTting Sepsis to Save Lives: A  
48  
49 458 Nationwide Computer Algorithm for Early Detection of Sepsis. *The Joint Commission*  
50  
51 459 *Journal on Quality and Patient Safety*. 2020 Jul;46(7):381–91.  
52  
53  
54  
55  
56  
57  
58  
59  
60

- 1  
2  
3 460 17. Ansermino JM, Wiens MO, Kissoon N. We need smarter trigger tools for diagnosing  
4  
5 461 sepsis in children in Canada. *Can Med Assoc J.* 2018 Sep 10;190(36):E1060–1.  
6  
7  
8 462 18. Yin J, Ngiam KY, Teo HH. Role of Artificial Intelligence Applications in Real-Life  
9  
10 463 Clinical Practice: Systematic Review. *J Med Internet Res.* 2021 Apr 22;23(4):e25759.  
11  
12 464 19. Persad E, Jost K, Honoré A, Forsberg D, Coste K, Olsson H, et al. Neonatal sepsis  
13  
14 465 prediction through clinical decision support algorithms: A systematic review. *Acta*  
15  
16 466 *Paediatr.* 2021 Dec 12;110(12):3201–26.  
17  
18  
19 467 20. Schinkel M, Paranjape K, Nannan Panday RS, Skyttberg N, Nanayakkara PWB. Clinical  
20  
21 468 applications of artificial intelligence in sepsis: A narrative review. *Comput Biol Med.*  
22  
23 469 2019 Dec;115:103488.  
24  
25  
26 470 21. Sundararajan S, Doctor A. Early recognition of neonatal sepsis using a bioinformatic vital  
27  
28 471 sign monitoring tool. *Pediatr Res.* 2021 Oct 29;  
29  
30  
31 472 22. Al-Shwaheen TI, Moghbel M, Hau YW, Ooi CY. Use of learning approaches to predict  
32  
33 473 clinical deterioration in patients based on various variables: a review of the literature. *Artif*  
34  
35 474 *Intell Rev.* 2021 Mar 13;  
36  
37  
38 475 23. Sahu P, Raj Stanly EA, Simon Lewis LE, Prabhu K, Rao M, Kunhikatta V. Prediction  
39  
40 476 modelling in the early detection of neonatal sepsis. *World Journal of Pediatrics.* 2022 Jan  
41  
42 477 5;  
43  
44  
45 478 24. Hassan N, Slight R, Weiland D, Vellinga A, Morgan G, Aboushareb F, et al. Preventing  
46  
47 479 sepsis; how can artificial intelligence inform the clinical decision-making process? A  
48  
49 480 systematic review. *Int J Med Inform.* 2021 Jun;150:104457.  
50  
51  
52  
53  
54  
55  
56  
57  
58  
59  
60



- 1  
2  
3 481 25. Muralitharan S, Nelson W, Di S, McGillion M, Devereaux P, Barr NG, et al. Machine  
4  
5 482 Learning–Based Early Warning Systems for Clinical Deterioration: Systematic Scoping  
6  
7 483 Review. *J Med Internet Res*. 2021 Feb 4;23(2):e25187.
- 8  
9  
10 484 26. Wu M, Du X, Gu R, Wei J. Artificial Intelligence for Clinical Decision Support in Sepsis.  
11  
12 485 *Front Med (Lausanne)*. 2021 May 13;8.
- 13  
14 486 27. S. Wheeler D. "Children are not Small Adults!". *Open Inflamm J*. 2011 Oct 7;4(1):4–15.
- 15  
16 487 28. Wulff A, Montag S, Marschollek M, Jack T. Clinical Decision-Support Systems for  
17  
18 488 Detection of Systemic Inflammatory Response Syndrome, Sepsis, and Septic Shock in  
19  
20 489 Critically Ill Patients: A Systematic Review. *Methods Inf Med*. 2019 Dec 9;58(S 02):e43–  
21  
22 490 57.
- 23  
24  
25 491 29. Peiffer-Smadja N, Rawson TM, Ahmad R, Buchard A, Georgiou P, Lescure FX, et al.  
26  
27 492 Machine learning for clinical decision support in infectious diseases: a narrative review of  
28  
29 493 current applications. *Clinical Microbiology and Infection*. 2020 May;26(5):584–95.
- 30  
31 494 30. Eisenberg MA, Balamuth F. Pediatric sepsis screening in US hospitals. *Pediatr Res*. 2021  
32  
33 495 Aug 20;
- 34  
35  
36 496 31. Teng AK, Wilcox AB. A Review of Predictive Analytics Solutions for Sepsis Patients.  
37  
38 497 *Appl Clin Inform*. 2020 May 27;11(03):387–98.
- 39  
40  
41 498 32. Ocampo-Quintero N, Vidal-Cortés P, del Río Carbajo L, Fdez-Riverola F, Reboiro-Jato  
42  
43 499 M, Glez-Peña D. Enhancing sepsis management through machine learning techniques: A  
44  
45 500 review. *Med Intensiva*. 2020 May;
- 46  
47  
48 501 33. Eisenberg MA, Balamuth F. Pediatric sepsis screening in US hospitals. *Pediatr Res*. 2021  
49  
50 502 Aug 20;
- 51  
52  
53  
54  
55  
56  
57  
58  
59  
60

- 1  
2  
3 503 34. Fernandes M, Vieira SM, Leite F, Palos C, Finkelstein S, Sousa JMC. Clinical Decision  
4  
5 504 Support Systems for Triage in the Emergency Department using Intelligent Systems: a  
6  
7 505 Review. *Artif Intell Med.* 2020 Jan;102:101762.
- 8  
9  
10 506 35. Fleuren LM, Klausch TLT, Zwager CL, Schoonmade LJ, Guo T, Roggeveen LF, et al.  
11  
12 507 Machine learning for the prediction of sepsis: a systematic review and meta-analysis of  
13  
14 508 diagnostic test accuracy. *Intensive Care Med.* 2020 Mar 21;46(3):383–400.
- 15  
16  
17 509 36. Makam AN, Nguyen OK, Auerbach AD. Diagnostic accuracy and effectiveness of  
18  
19 510 automated electronic sepsis alert systems: A systematic review. *J Hosp Med.* 2015  
20  
21 511 Jun;10(6):396–402.
- 22  
23  
24 512 37. Smyth MA, Brace-McDonnell SJ, Perkins GD. Identification of adults with sepsis in the  
25  
26 513 prehospital environment: a systematic review. *BMJ Open.* 2016 Aug 5;6(8):e011218.
- 27  
28  
29 514 38. Despins LA. Automated Detection of Sepsis Using Electronic Medical Record Data: A  
30  
31 515 Systematic Review. *Journal for Healthcare Quality.* 2017 Nov;39(6):322–33.
- 32  
33 516 39. Li L, Ackermann K, Baker J, Westbrook J. Use and Evaluation of Computerized Clinical  
34  
35 517 Decision Support Systems for Early Detection of Sepsis in Hospitals: Protocol for a  
36  
37 518 Scoping Review. *JMIR Res Protoc.* 2020 Nov 20;9(11):e24899.
- 38  
39  
40 519 40. Patton L, Young V. Effectiveness of provider strategies for the early recognition of  
41  
42 520 clinical deterioration due to sepsis in pediatric patients. *JBI Database System Rev*  
43  
44 521 *Implement Rep.* 2017 Jan;15(1):76–85.
- 45  
46  
47 522 41. Pepic I, Feldt R, Ljungström L, Torkar R, Dalevi D, Maurin Söderholm H, et al. Early  
48  
49 523 detection of sepsis using artificial intelligence: a scoping review protocol. *Syst Rev.* 2021  
50  
51 524 Dec 16;10(1):28.

- 1  
2  
3 525 42. Chapman SM, Wray J, Oulton K, Peters MJ. Systematic review of paediatric track and  
4  
5 526 trigger systems for hospitalised children. *Resuscitation*. 2016 Dec;109:87–109.  
6  
7 527 43. Trubey R, Huang C, Lugg-Widger F v, Hood K, Allen D, Edwards D, et al. Validity and  
8  
9 528 effectiveness of paediatric early warning systems and track and trigger tools for  
10  
11 529 identifying and reducing clinical deterioration in hospitalised children: a systematic  
12  
13 530 review. *BMJ Open*. 2019 May 5;9(5):e022105.  
14  
15 531 44. Arksey H, O'Malley L. Scoping studies: towards a methodological framework. *Int J Soc*  
16  
17 532 *Res Methodol*. 2005 Feb;8(1):19–32.  
18  
19 533 45. Levac D, Colquhoun H, O'Brien KK. Scoping studies: advancing the methodology.  
20  
21 534 *Implementation Science*. 2010 Dec 20;5(1):69.  
22  
23 535 46. Tricco AC, Lillie E, Zarin W, O'Brien KK, Colquhoun H, Levac D, et al. PRISMA  
24  
25 536 Extension for Scoping Reviews (PRISMA-ScR): Checklist and Explanation. *Ann Intern*  
26  
27 537 *Med*. 2018 Oct 2;169(7):467–73.  
28  
29 538 47. Peters MDJ, Godfrey C, McInerney P, Khalil H, Larsen P, Marnie C, et al. Best practice  
30  
31 539 guidance and reporting items for the development of scoping review protocols. *JBIM Evid*  
32  
33 540 *Synth*. 2022 Apr;20(4):953–68.  
34  
35 541 48. Wohlin C. Guidelines for snowballing in systematic literature studies and a replication in  
36  
37 542 software engineering. In: *Proceedings of the 18th International Conference on Evaluation*  
38  
39 543 *and Assessment in Software Engineering - EASE '14*. New York, New York, USA: ACM  
40  
41 544 Press; 2014. p. 1–10.  
42  
43 545 49. Hagan JF, Shaw JS, Duncan PM. *Bright futures*. American Academy of Pediatrics; 2017.  
44  
45  
46  
47  
48  
49  
50  
51  
52  
53  
54  
55  
56  
57  
58  
59  
60

- 1  
2  
3 546 50. Fletcher RR, Nakeshimana A, Olubeko O. Addressing Fairness, Bias, and Appropriate  
4  
5 547 Use of Artificial Intelligence and Machine Learning in Global Health. *Front Artif Intell.*  
6  
7 548 2021 Apr 15;3.  
8  
9  
10 549 51. Pot M, Kieusseyan N, Prainsack B. Not all biases are bad: equitable and inequitable biases  
11  
12 550 in machine learning and radiology. *Insights Imaging.* 2021 Dec 10;12(1):13.  
13  
14  
15 551  
16  
17  
18  
19  
20  
21  
22  
23  
24  
25  
26  
27  
28  
29  
30  
31  
32  
33  
34  
35  
36  
37  
38  
39  
40  
41  
42  
43  
44  
45  
46  
47  
48  
49  
50  
51  
52  
53  
54  
55  
56  
57  
58  
59  
60

## PRISMA-P 2015 Checklist

This checklist has been adapted for use with systematic review protocol submissions to BioMed Central journals from Table 3 in Moher D et al: Preferred reporting items for systematic review and meta-analysis protocols (PRISMA-P) 2015 statement. *Systematic Reviews* 2015 4:1

An Editorial from the Editors-in-Chief of *Systematic Reviews* details why this checklist was adapted – Moher D, Stewart L & Shekelle P: Implementing PRISMA-P: recommendations for prospective authors. *Systematic Reviews* 2016 5:15

| Section/topic                     | #  | Checklist item                                                                                                                                                                                  | Information reported                |                                     | Line number(s) |
|-----------------------------------|----|-------------------------------------------------------------------------------------------------------------------------------------------------------------------------------------------------|-------------------------------------|-------------------------------------|----------------|
|                                   |    |                                                                                                                                                                                                 | Yes                                 | No                                  |                |
| <b>ADMINISTRATIVE INFORMATION</b> |    |                                                                                                                                                                                                 |                                     |                                     |                |
| <b>Title</b>                      |    |                                                                                                                                                                                                 |                                     |                                     |                |
| Identification                    | 1a | Identify the report as a protocol of a systematic review                                                                                                                                        | <input checked="" type="checkbox"/> | <input type="checkbox"/>            | 1              |
| Update                            | 1b | If the protocol is for an update of a previous systematic review, identify as such                                                                                                              | <input type="checkbox"/>            | <input checked="" type="checkbox"/> | N/A            |
| <b>Registration</b>               | 2  | If registered, provide the name of the registry (e.g., PROSPERO) and registration number in the Abstract                                                                                        | <input checked="" type="checkbox"/> | <input type="checkbox"/>            | 62, 180        |
| <b>Authors</b>                    |    |                                                                                                                                                                                                 |                                     |                                     |                |
| Contact                           | 3a | Provide name, institutional affiliation, and e-mail address of all protocol authors; provide physical mailing address of corresponding author                                                   | <input checked="" type="checkbox"/> | <input type="checkbox"/>            | 4-29           |
| Contributions                     | 3b | Describe contributions of protocol authors and identify the guarantor of the review                                                                                                             | <input checked="" type="checkbox"/> | <input type="checkbox"/>            | 396-401        |
| <b>Amendments</b>                 | 4  | If the protocol represents an amendment of a previously completed or published protocol, identify as such and list changes; otherwise, state plan for documenting important protocol amendments | <input type="checkbox"/>            | <input checked="" type="checkbox"/> | N/A            |
| <b>Support</b>                    |    |                                                                                                                                                                                                 |                                     |                                     |                |
| Sources                           | 5a | Indicate sources of financial or other support for the review                                                                                                                                   | <input checked="" type="checkbox"/> | <input type="checkbox"/>            | 414-415        |
| Sponsor                           | 5b | Provide name for the review funder and/or sponsor                                                                                                                                               | <input checked="" type="checkbox"/> | <input type="checkbox"/>            | 408, 414-415   |
| Role of sponsor/funder            | 5c | Describe roles of funder(s), sponsor(s), and/or institution(s), if any, in developing the protocol                                                                                              | <input checked="" type="checkbox"/> | <input type="checkbox"/>            | 408, 414-415   |
| <b>INTRODUCTION</b>               |    |                                                                                                                                                                                                 |                                     |                                     |                |
| <b>Rationale</b>                  | 6  | Describe the rationale for the review in the context of what is already known                                                                                                                   | <input checked="" type="checkbox"/> | <input type="checkbox"/>            | 87-164         |

| Section/topic                      | #   | Checklist item                                                                                                                                                                                                                              | Information reported                |                                     | Line number(s)   |
|------------------------------------|-----|---------------------------------------------------------------------------------------------------------------------------------------------------------------------------------------------------------------------------------------------|-------------------------------------|-------------------------------------|------------------|
|                                    |     |                                                                                                                                                                                                                                             | Yes                                 | No                                  |                  |
| Objectives                         | 7   | Provide an explicit statement of the question(s) the review will address with reference to participants, interventions, comparators, and outcomes (PICO)                                                                                    | <input checked="" type="checkbox"/> | <input type="checkbox"/>            | 183-198          |
| <b>METHODS</b>                     |     |                                                                                                                                                                                                                                             |                                     |                                     |                  |
| Eligibility criteria               | 8   | Specify the study characteristics (e.g., PICO, study design, setting, time frame) and report characteristics (e.g., years considered, language, publication status) to be used as criteria for eligibility for the review                   | <input checked="" type="checkbox"/> | <input type="checkbox"/>            | 230-255          |
| Information sources                | 9   | Describe all intended information sources (e.g., electronic databases, contact with study authors, trial registers, or other grey literature sources) with planned dates of coverage                                                        | <input checked="" type="checkbox"/> | <input type="checkbox"/>            | 201-211          |
| Search strategy                    | 10  | Present draft of search strategy to be used for at least one electronic database, including planned limits, such that it could be repeated                                                                                                  | <input checked="" type="checkbox"/> | <input type="checkbox"/>            | 218-219, 231-255 |
| <b>STUDY RECORDS</b>               |     |                                                                                                                                                                                                                                             |                                     |                                     |                  |
| Data management                    | 11a | Describe the mechanism(s) that will be used to manage records and data throughout the review                                                                                                                                                | <input checked="" type="checkbox"/> | <input type="checkbox"/>            | 220-227, 260-264 |
| Selection process                  | 11b | State the process that will be used for selecting studies (e.g., two independent reviewers) through each phase of the review (i.e., screening, eligibility, and inclusion in meta-analysis)                                                 | <input checked="" type="checkbox"/> | <input type="checkbox"/>            | 260-274          |
| Data collection process            | 11c | Describe planned method of extracting data from reports (e.g., piloting forms, done independently, in duplicate), any processes for obtaining and confirming data from investigators                                                        | <input checked="" type="checkbox"/> | <input type="checkbox"/>            | 220-227, 231-255 |
| Data items                         | 12  | List and define all variables for which data will be sought (e.g., PICO items, funding sources), any pre-planned data assumptions and simplifications                                                                                       | <input checked="" type="checkbox"/> | <input type="checkbox"/>            | 277-308          |
| Outcomes and prioritization        | 13  | List and define all outcomes for which data will be sought, including prioritization of main and additional outcomes, with rationale                                                                                                        | <input type="checkbox"/>            | <input checked="" type="checkbox"/> | N/A              |
| Risk of bias in individual studies | 14  | Describe anticipated methods for assessing risk of bias of individual studies, including whether this will be done at the outcome or study level, or both; state how this information will be used in data synthesis                        | <input type="checkbox"/>            | <input checked="" type="checkbox"/> | N/A              |
| <b>DATA</b>                        |     |                                                                                                                                                                                                                                             |                                     |                                     |                  |
| Synthesis                          | 15a | Describe criteria under which study data will be quantitatively synthesized                                                                                                                                                                 | <input checked="" type="checkbox"/> | <input type="checkbox"/>            | 311-319          |
|                                    | 15b | If data are appropriate for quantitative synthesis, describe planned summary measures, methods of handling data, and methods of combining data from studies, including any planned exploration of consistency (e.g., $I^2$ , Kendall's tau) | <input type="checkbox"/>            | <input checked="" type="checkbox"/> | N/A              |
|                                    | 15c | Describe any proposed additional analyses (e.g., sensitivity or subgroup analyses, meta-regression)                                                                                                                                         | <input type="checkbox"/>            | <input checked="" type="checkbox"/> | N/A              |
|                                    | 15d | If quantitative synthesis is not appropriate, describe the type of summary planned                                                                                                                                                          | <input checked="" type="checkbox"/> | <input type="checkbox"/>            | 320-330          |

| Section/topic                            | #  | Checklist item                                                                                                              | Information reported                |                                     | Line number(s) |
|------------------------------------------|----|-----------------------------------------------------------------------------------------------------------------------------|-------------------------------------|-------------------------------------|----------------|
|                                          |    |                                                                                                                             | Yes                                 | No                                  |                |
| <b>Meta-bias(es)</b>                     | 16 | Specify any planned assessment of meta-bias(es) (e.g., publication bias across studies, selective reporting within studies) | <input type="checkbox"/>            | <input checked="" type="checkbox"/> | N/A            |
| <b>Confidence in cumulative evidence</b> | 17 | Describe how the strength of the body of evidence will be assessed (e.g., GRADE)                                            | <input checked="" type="checkbox"/> | <input type="checkbox"/>            | 333-336        |

For peer review only

# BMJ Open

## Automated digital technologies for supporting sepsis prediction in children: A scoping review protocol

|                                 |                                                                                                                                                                                                                                                                                                                                                                                                                                                                                                                                             |
|---------------------------------|---------------------------------------------------------------------------------------------------------------------------------------------------------------------------------------------------------------------------------------------------------------------------------------------------------------------------------------------------------------------------------------------------------------------------------------------------------------------------------------------------------------------------------------------|
| Journal:                        | <i>BMJ Open</i>                                                                                                                                                                                                                                                                                                                                                                                                                                                                                                                             |
| Manuscript ID                   | bmjopen-2022-065429.R2                                                                                                                                                                                                                                                                                                                                                                                                                                                                                                                      |
| Article Type:                   | Protocol                                                                                                                                                                                                                                                                                                                                                                                                                                                                                                                                    |
| Date Submitted by the Author:   | 02-Nov-2022                                                                                                                                                                                                                                                                                                                                                                                                                                                                                                                                 |
| Complete List of Authors:       | Tennant, Ryan; University of Waterloo Faculty of Engineering, Department of Systems Design Engineering<br>Graham, Jennifer; University of Waterloo Faculty of Arts, Department of Psychology<br>Mercer, Kate; University of Waterloo Faculty of Engineering, Department of Systems Design Engineering; University of Waterloo, Library<br>Ansermino, J. Mark; The University of British Columbia, Department of Anesthesiology<br>Burns, Catherine; University of Waterloo Faculty of Engineering, Department of Systems Design Engineering |
| <b>Primary Subject Heading</b>: | Health informatics                                                                                                                                                                                                                                                                                                                                                                                                                                                                                                                          |
| Secondary Subject Heading:      | Paediatrics, Research methods                                                                                                                                                                                                                                                                                                                                                                                                                                                                                                               |
| Keywords:                       | PAEDIATRICS, Health informatics < BIOTECHNOLOGY & BIOINFORMATICS, Information technology < BIOTECHNOLOGY & BIOINFORMATICS, Paediatric intensive & critical care < PAEDIATRICS                                                                                                                                                                                                                                                                                                                                                               |
|                                 |                                                                                                                                                                                                                                                                                                                                                                                                                                                                                                                                             |

SCHOLARONE™  
Manuscripts



1  
2  
3 1 **Automated digital technologies for supporting sepsis prediction in children: A scoping**  
4 **review protocol**  
5 2  
6 3

7  
8 4 **Ryan Tennant, BAsC., MASc. (corresponding author)**  
9

10 5 Department of Systems Design Engineering, Faculty of Engineering, University of Waterloo  
11  
12 6 200 University Avenue West, Waterloo, Ontario, Canada, N2L3G1  
13  
14 7 email: drtennan@uwaterloo.ca  
15

16 8  
17 9 **Jennifer Graham**

18  
19 10 Department of Psychology, University of Waterloo  
20  
21 11 200 University Avenue West, Waterloo, Ontario, Canada, N2L3G1  
22  
23 12 email: j38graham@uwaterloo.ca  
24

25 14 **Kate Mercer, Ph.D.**

26  
27 15 Library, University of Waterloo  
28  
29 16 Department of Systems Design Engineering, Faculty of Engineering, University of Waterloo  
30  
31 17 200 University Avenue West, Waterloo, Ontario, Canada, N2L3G1  
32  
33 18 email: kmercer@uwaterloo.ca  
34

35  
36 20 **J Mark Ansermino, MBBCh.**

37  
38 21 Centre for International Child Health, BC Children's Hospital  
39  
40 22 Department of Anesthesiology, The University of British Columbia  
41  
42 23 950 West 28<sup>th</sup> Avenue, Vancouver, British Columbia, Canada, V5Z4H4  
43  
44 24 email: mansermino@bcchr.ca  
45

46 26 **Catherine M Burns, Ph.D., PEng.**

47  
48 27 Department of Systems Design Engineering, Faculty of Engineering, University of Waterloo  
49  
50 28 200 University Avenue West, Waterloo, Ontario, Canada, N2L3G1  
51  
52 29 email: c4burns@uwaterloo.ca  
53

54  
55 31 **Word Count:** 3217  
56  
57  
58  
59  
60

## 32 **ABSTRACT**

33 **Introduction** While there have been several literature reviews on the performance of digital  
34 sepsis prediction technologies and clinical decision-support algorithms for adults, there remains a  
35 knowledge gap in examining the development of automated technologies for sepsis prediction in  
36 children. This scoping review will critically analyze the current evidence on the design and  
37 performance of automated digital technologies to predict paediatric sepsis, to advance their  
38 development and integration within clinical settings.

39  
40 **Methods and analysis** This scoping review will follow Arksey and O'Malley's framework,  
41 conducted between February to December 2022. We will further develop the protocol using the  
42 Preferred Reporting Items for Systematic Reviews and Meta-Analyses extension for scoping  
43 reviews (PRISMA-ScR). We plan to search the following databases: Association of Computing  
44 Machinery (ACM) Digital Library, Cumulative Index to Nursing and Allied Health Literature  
45 (CINAHL), Embase, Google Scholar, Institute of Electric and Electronic Engineers (IEEE),  
46 PubMed, Scopus, and Web of Science. Studies will be included on children >90 days post-natal  
47 to <21 years old, predicted to have or be at risk of developing sepsis by a digitalized model or  
48 algorithm designed for a clinical setting. Two independent reviewers will complete the abstract  
49 and full-text screening and the data extraction. Thematic analysis will be used to develop  
50 overarching concepts and present the narrative findings with quantitative results and descriptive  
51 statistics displayed in data tables.

52  
53 **Ethics and dissemination** Ethics approval for this scoping review study of the available  
54 literature is not required. We anticipate that the scoping review will identify the current evidence

1  
2  
3 55 and design characteristics of digital prediction technologies for the timely and accurate  
4  
5 56 prediction of paediatric sepsis and factors influencing clinical integration. We plan to  
6  
7 57 disseminate the preliminary findings from this review at national and international research  
8  
9 58 conferences in global and digital health, gathering critical feedback from multi-disciplinary  
10  
11 59 stakeholders.  
12  
13  
14  
15  
16

### 17 61 **Scoping review registration**

18  
19 62 [https://osf.io/veqha/?view\\_only=f560d4892d7c459ea4cff6dcdfacb086](https://osf.io/veqha/?view_only=f560d4892d7c459ea4cff6dcdfacb086)  
20  
21  
22 63

### 23 64 **Strengths and limitations of this study**

- 24  
25  
26 65 • This review is a rigorous approach to collectively synthesizing current research on  
27  
28 66 automated paediatric sepsis prediction technologies, critically examining the relationships  
29  
30 67 between their design, performance, and clinical integration to identify sociotechnical  
31  
32 68 challenges and research gaps.  
33  
34  
35 69 • The chosen review strategy will comprehensively evaluate the vast literature across  
36  
37 70 various study types and research disciplines by a multi-disciplinary research team.  
38  
39  
40 71 • The review will exclude digital prediction technologies for paediatric sepsis treatment  
41  
42 72 decisions and is limited to peer-reviewed literature written in the English language with a  
43  
44 73 full-text version available.  
45  
46  
47 74 • Articles focusing on age cohorts <90 days post-natal or >21 years old will be excluded  
48  
49 75 due to significant differences in sepsis etiology and clinical presentation.  
50  
51  
52  
53  
54  
55  
56  
57  
58  
59  
60

## 76 INTRODUCTION

77 Globally, it is estimated there were a total of 25.2 million cases of sepsis in children (<19) in  
 78 2017, imposing significant health care and societal burden (1). Healthcare costs for severe  
 79 paediatric sepsis hospitalizations reached approximately \$7.31 billion in the United States in  
 80 2016, accounting for almost 20% of total paediatric hospitalization costs (2). However, about  
 81 85% of global sepsis cases and 84.5% of sepsis-related deaths among all age groups occur in  
 82 low-middle income countries, specifically those in sub-Saharan Africa and South-East Asia (1).  
 83 Annual global mortality rates for children (<5) are approximately 2.9 million (Table 1) (3).

84  
 85 Table 1. Differences between global neonatal, paediatric, and adult sepsis (3).

|                             | Neonatal (<90 days) | Paediatric (<5 y/o) | Adult (>20 y/o) |
|-----------------------------|---------------------|---------------------|-----------------|
| <b>Annual Cases (M)</b>     | 1.3 – 3.9           | 20.3                | 23.7            |
| <b>Annual Mortality (M)</b> | 0.4 – 0.7           | 2.9                 | 7.7             |

86  
 87 Early recognition of sepsis in children is challenging. Unlike adult sepsis, children have  
 88 different sepsis aetiologies (3). For example, children commonly develop sepsis from  
 89 pneumonia, diarrhea, meningitis, or viral infections, where abdominal or genitourinary sources  
 90 are more common in adults (4). Differences in aetiology can also be found between childhood  
 91 and neonatal sepsis, with early-onset neonatal sepsis having a distinct microbial pattern (5).  
 92 Recognizing sepsis in children is also significantly more challenging due to maturation-based  
 93 differences in physiology (including immune system response), limitations in the communication  
 94 of symptoms, and diagnostic modalities (4,6,7). Sepsis can lead to life-altering organ dysfunction  
 95 if not identified quickly in children (8), where mortality rates are reduced two-fold if treated  
 96 within the first hour (4). Recognition of sepsis is confounded by the age-based symptom  
 97 variations within children, such as their differences in blood pressure response, serum lactate

1  
2  
3 98 levels (4), and commonalities among other childhood conditions and syndromes like Kawasaki  
4  
5 99 syndrome or bronchiolitis (9). This milieu of complex information combined with significant  
6  
7  
8 100 time pressure provides a significant cognitive burden for healthcare professionals to promptly  
9  
10 101 identify the onset of deterioration that can lead to this serious medical condition.

12 102 In 2020, updated Paediatric Sepsis Survival guidelines were published calling for the  
13  
14 103 integration of screening standards in healthcare facilities to support rapid identification of sepsis  
15  
16 104 in children (10) and provide the appropriate antimicrobial therapy at the proper time (5,10).  
17  
18 105 Established screening tools such as the Paediatric Early Warning Score (PEWS) may support the  
19  
20 106 timeliness of detecting clinical deterioration in children that can lead to sepsis (11). Recently,  
21  
22 107 adaptations to the Sequential Organ Assessment Score (SOFA) for paediatric patients (pSOFA)  
23  
24 108 and neonates (nSOFA) have shown promise in identifying children at risk for mortality with  
25  
26 109 sepsis (12); however, it is controversial whether these scores provide value in low-resource  
27  
28 110 environments (13–15). Development and implementation of algorithms such as the Sepsis  
29  
30 111 Prediction and Optimization Therapy (SPOT) that can analyze electronic health data in real-time  
31  
32 112 to provide a rule-based approach to initiate a physical sepsis screen have also been reported (16).  
33  
34 113 With the call from the World Health Organization to improve sepsis identification and the  
35  
36 114 potential for data-driven and knowledge-based technologies (3,17), digital prediction  
37  
38 115 technologies are becoming more advanced using mathematical, statistical, and machine learning  
39  
40 116 techniques to support sepsis prediction utilizing clinical information, symptoms, biomarkers, and  
41  
42 117 other signs at the bedside (18–21). While recent reviews have explored the literature on the  
43  
44 118 effectiveness of digital technologies for adult and neonate sepsis prediction (18,19,22–26), there  
45  
46 119 is currently no review on the design and implementation of these predictive technologies for  
47  
48 120 children. Considering the pathophysiology and aetiology for paediatric sepsis are different from  
49  
50  
51  
52  
53  
54  
55  
56  
57  
58  
59  
60

1  
2  
3 121 that seen in adults and neonates (27), combined with the lack of widely accessible digital  
4  
5 122 technologies for children compared to adults (28), it is critically important to review the  
6  
7  
8 123 literature on this age cohort.  
9

10 124

### 12 125 **Prior reviews on sepsis prediction technologies**

14  
15 126 Recent narrative reviews discuss machine learning-based technologies for adult and paediatric  
16  
17 127 sepsis (20,29,30). However, their eligibility criteria focus primarily on adults, with only two (20)  
18  
19 128 or three (29) articles on children. Some reviews excluded digital technologies that were not  
20  
21 129 based on “modern” machine learning models (21,30), or involved a broad search on infectious  
22  
23 130 disease prediction beyond sepsis (29). Others have also limited their investigations to  
24  
25 131 PubMed/Medline, excluding engineering databases, which may provide greater insight into the  
26  
27 132 design characteristics of digital technologies (20,26,31–33), or they focus exclusively on US  
28  
29 133 hospitals (33).  
30  
31  
32

33 134 Many systematic and scoping reviews have been rigorous in their search strategy but  
34  
35 135 similar to the identified narrative reviews, report on screening tools and technologies for adult  
36  
37 136 patients while excluding children (24,25,28,34–37), and the engineering disciplines (19,23,38–  
38  
39 137 40). Currently published protocols plan to exclude literature on the application of machine  
40  
41 138 learning (39,41), which may not capture research on certain relevant technologies. While there  
42  
43 139 have been systematic reviews on the performance of neonatal sepsis prediction and recognition  
44  
45 140 technologies providing insight into their capabilities (19,23), none focus on the specifics of  
46  
47 141 paediatric sepsis.  
48  
49  
50

51 142 Current systematic reviews that include the paediatric literature as part of their search  
52  
53 143 strategy are not strictly focused on this patient population (22,28,38), having only identified one  
54  
55  
56  
57  
58  
59  
60

1  
2  
3 144 (38) or three (22,28) related articles specific to children. Other reviews broadly examine early  
4  
5 145 warning systems for paediatric clinical deterioration (42,43). We have not identified any  
6  
7  
8 146 systematic or scoping reviews that accurately scope the literature on digital paediatric sepsis  
9  
10 147 prediction technology. While one identified protocol aims to capture strategies for early  
11  
12 148 recognition of paediatric sepsis from clinical deterioration, the focus of the review is general  
13  
14  
15 149 strategy effectiveness and does not explicitly include engineering databases which would  
16  
17 150 describe technical design aspects (40).  
18

19 151

## 21 152 **Purpose of the study**

23  
24 153 Given the limitations of recent literature reviews and the lack of reviews focused on paediatric  
25  
26 154 sepsis, it is necessary to synthesize the current research describing the development and  
27  
28 155 evaluation of automated sepsis prediction technologies for this underrepresented age cohort. The  
29  
30 156 scoping review defined by this protocol will identify and summarize the existing literature on the  
31  
32  
33 157 design characteristics, performance, and integration of automated sepsis prediction technologies  
34  
35 158 in paediatric contexts. The scoping review, a methodology focusing on answering broader  
36  
37  
38 159 research questions through a systematic search and presenting tabular findings along with a  
39  
40 160 narrative integration (44), was identified as the best approach for this study. We anticipate that  
41  
42 161 the rigorous methodology will warrant a meaningful summary about the current development of  
43  
44  
45 162 digital technologies for sepsis prediction that can inform future research toward improving their  
46  
47 163 performance and evidence-based clinical implementation to ultimately improve the lives of  
48  
49 164 children globally.  
50

51 165

## 54 166 **METHODS AND ANALYSIS**

1  
2  
3 167 The reviewers on this scoping review consist of a multi-disciplinary team of engineers, a health  
4  
5 168 researcher/biomedical engineering research librarian, a psychology student, and a paediatric  
6  
7  
8 169 clinician. Our methodology will be guided by the framework developed by Arksey and O'Mally  
9  
10 170 (44), which iterates through six steps: (i) identifying the research questions; (ii) searching for  
11  
12 171 relevant studies; (iii) selecting the studies; (iv) charting the data; (v) collating, summarizing, and  
13  
14 172 reporting the results; and (vi) consulting with stakeholders to inform or validate findings. The  
15  
16 173 sixth step is optional, and we will modify this step to consult with experts specifically around  
17  
18 174 finding technologies used in hospital or industry settings. Levac's recommendations for  
19  
20 175 independent full-text reviews by at least two reviewers will also be followed (45). This study  
21  
22 176 protocol will follow the Preferred Reporting Items for Systematic Reviews and Meta-Analyses  
23  
24 177 extension for a scoping review (PRISMA-ScR) (46) with any gaps being filled by the Preferred  
25  
26 178 Reporting Items for Systematic Reviews and Meta-Analyses extension for protocols (PRISMA-  
27  
28 179 P) (47). This protocol has been registered on the Open Science Framework  
29  
30  
31  
32 180 ([https://osf.io/nh6qz/?view\\_only=8c840412a2a44117ac16fdf76e06abd6](https://osf.io/nh6qz/?view_only=8c840412a2a44117ac16fdf76e06abd6)).  
33  
34  
35  
36  
37

### 38 **Step 1: identifying the research questions**

39  
40 183 The research questions were developed through an initial search of the literature on automated  
41  
42 184 digital technologies for paediatric sepsis recognition and gaps identified in current systematic  
43  
44 185 and narrative reviews in the neonatal and adult context. The Joanna Briggs Institute  
45  
46 186 recommendations of the Population, Concept, and Context model were followed (48),  
47  
48 187 maintaining a broad scope for understanding the existing evidence on paediatric sepsis prediction  
49  
50 188 technologies with respect to their current performance, identified outcome measures, and  
51  
52  
53 189 existing research gaps:  
54  
55  
56  
57  
58  
59  
60



- 190 1. How do the design characteristics of automated paediatric sepsis prediction technologies  
191 for healthcare facilities (e.g., the recognition task, type, method, demographics, and  
192 indicators) influence their performance?
- 193 2. What are the impacts of clinically implemented automated paediatric sepsis prediction  
194 technologies on decision-making and patient outcome measures?
- 195 3. What challenges and research gaps (e.g., evidence, practical knowledge, population,  
196 theoretical, methodological) exist for improving the sociotechnical integration of  
197 knowledge-based algorithms and data-driven models for predicting paediatric sepsis in  
198 healthcare facilities?

## 200 **Step 2: identifying relevant studies**

201 We will conduct a comprehensive scoping review that includes a multi-disciplinary group of  
202 scholarly databases: Association of Computing Machinery (ACM) Digital Library, Cumulative  
203 Index to Nursing and Allied Health Literature (CINAHL), Embase, Google Scholar, Institute of  
204 Electric and Electronic Engineers (IEEE), PubMed, Scopus, and Web of Science. Articles will  
205 further be identified using the snowballing technique (49), to identify relevant literature among  
206 the references and citations of articles included for the full review. We will also hand-search for  
207 reports on the design, validation, and implementation of commercial digital technologies for  
208 sepsis prediction, which may be approved by governing bodies such as Health Canada (health-  
209 products.canada.ca/mdall-limh/), the Food and Drug Administration  
210 ([accessdata.fda.gov/scripts/cdrh/cfdocs/cfrl/textsearch.cfm](http://accessdata.fda.gov/scripts/cdrh/cfdocs/cfrl/textsearch.cfm)), and the European Union Medical  
211 Device Regulation ([ec.europa.eu/tools/eudamed/#/screen/home](http://ec.europa.eu/tools/eudamed/#/screen/home)).

212 Guided by a University of Waterloo biomedical engineering research librarian, we  
 213 developed a comprehensive search strategy for each database. The approach employs keywords,  
 214 medical subject headings (MeSH), key concept subject headings, and Boolean terms broken  
 215 down into the following parts: the recognition algorithm or model, type of digital technology,  
 216 health condition, alert type, implementation or validation factors, and patient population. A  
 217 sample search strategy for PubMed is presented in Table 2.

218 Table 2. Sample search strategy and results.

| Database      | Search Terms                                                                                                                                                                                                                                                                                                                                                                                                                                                                                                                                                                                                                                                                                                                                                                                                                                                                                                                                                                                                                                                                                                                                                                                                                                                                                                                                                                                                                                                                                                                                                                                                                                                                                          | Results | Date       |
|---------------|-------------------------------------------------------------------------------------------------------------------------------------------------------------------------------------------------------------------------------------------------------------------------------------------------------------------------------------------------------------------------------------------------------------------------------------------------------------------------------------------------------------------------------------------------------------------------------------------------------------------------------------------------------------------------------------------------------------------------------------------------------------------------------------------------------------------------------------------------------------------------------------------------------------------------------------------------------------------------------------------------------------------------------------------------------------------------------------------------------------------------------------------------------------------------------------------------------------------------------------------------------------------------------------------------------------------------------------------------------------------------------------------------------------------------------------------------------------------------------------------------------------------------------------------------------------------------------------------------------------------------------------------------------------------------------------------------------|---------|------------|
| <b>PubMed</b> | ("decision support"[All Fields] OR "decision-support"[All Fields] OR "early warning score"[MeSH Terms] OR "early warning score"[All Fields] OR "smart system*"[All Fields] OR "electronic alert*"[All Fields] OR "artificial intelligence"[All Fields] OR "artificial intelligence"[MeSH Terms] "machine learning"[All Fields] OR "deep learning"[All Fields] OR "neural network*"[All Fields] OR "support vector machine"[All Fields] OR "hidden markov model"[All Fields] OR "statistical learning"[All Fields] OR "predictive function"[All Fields] OR "algorithm"[All Fields] OR "algorithms"[MeSH Terms] OR "automat*"[All Fields] OR "comput*"[All Fields] OR "decision making, computer assisted"[MeSH Terms] OR "electronic*"[All Fields] OR "representation learning"[All Fields] OR "conformal prediction"[All Fields] OR "random forest"[All Fields] OR "naïve bayes"[All Fields] OR "regression" OR "regression analysis"[MeSH Terms] OR "gradient boosting"[All Fields] OR "artificial learning"[All Fields] OR "machine intelligence"[All Fields] OR "probabilistic network*"[All Fields] OR "knowledge representation"[All Fields] OR "bayesian learning"[All Fields] OR "expert system*"[All Fields] OR "technology assisted"[All Fields] OR "computer assisted"[All Fields] OR "statistical"[All Fields] OR "mathematical"[All Fields]) AND ("system"[All Fields] OR "tool"[All Fields] OR "alert*"[All Fields] OR "technology"[All Fields] OR "software"[All Fields] OR "model*"[All Fields] OR "engine"[All Fields] OR "approach*"[All Fields] OR "algorithm"[All Fields] OR "platform"[All Fields] OR "method*"[All Fields] OR "scor*"[All Fields] OR "device"[All Fields]) AND ( | 15,531  | 02/15/2022 |

---

"sepsis"[All Fields] OR "sepsis"[MeSH Terms] OR "septic shock"[All Fields] OR "systemic inflammatory response syndrome"[All Fields] OR "acute deterioration"[All Fields] OR "patient deterioration"[All Fields] OR "clinical deterioration"[MeSH Terms] OR "clinical deterioration"[All Fields] OR "severe infection"[All Fields] OR "severe bacterial infection"[All Fields] OR "bacterial infections"[MeSH Terms] OR "febrile illness"[All Fields] OR "non-malarial febrile illness"[All Fields] OR "bacteremia"[All Fields]) AND ( "diagnos\*"[All Fields] OR "detect\*"[All Fields] OR "predict\*"[All Fields] OR "prognosticate"[All Fields] OR "identif\*"[All Fields] OR "infer\*"[All Fields] OR "warn\*"[All Fields] OR "alert\*"[All Fields] OR "recog\*"[All Fields] OR "screen\*"[All Fields] OR "monitor\*"[All Fields] OR "assess\*"[All Fields] OR "surveillance"[All Fields] OR "classif\*"[All Fields] ) AND ( "evaluat\*"[All Fields] OR "implement\*"[All Fields] OR "perform\*"[All Fields] OR "design"[All Fields] OR "validat\*"[All Fields] OR "usability"[All Fields] OR "effectiveness"[All Fields] OR "efficiency"[All Fields] OR "satisfaction"[All Fields] OR "safety"[All Fields] OR "acceptance"[All Fields] OR "clinical value"[All Fields] OR "interpret\*"[All Fields] OR "perception"[All Fields] OR "perspective"[All Fields] OR "opinion"[All Fields] OR "error"[All Fields] ) AND ( "child\*"[All Fields] OR "paediatric"[All Fields] OR "pediatric"[All Fields] OR "pediatrics"[MeSH Terms] OR "toddler\*"[All Fields] OR "teen\*"[All Fields] OR "youth\*"[All Fields] OR "adolescenc\*"[All Fields] OR "adolescent"[MeSH Terms] OR "infan\*"[All Fields] OR "infant"[MeSH Terms] OR "school age\*"[All Fields] OR "PICU"[All Fields] ) LIMIT TO: [Text Availability]: Full text, [Language]: English, [Species]: Human

---

219  
 220 The search results will be imported to Mendeley's reference management software for  
 221 future referencing and organization (Mendeley Ltd.). A systematic review management software,  
 222 Covidence (Veritas Health Innovation Ltd.), will be used to identify and merge duplicate articles.  
 223 A sample of 20 abstracts will be initially screened by two reviewers (RT and JG), ensuring the  
 224 inclusion-exclusion requirements are robust in capturing relevant articles related to the design  
 225 and evaluation of automated prediction technologies for paediatric sepsis. Both reviewers will

226 also ensure that the data extraction items capture valuable and appropriate study details from the  
227 articles included in the full-text review, which will be shared with the research team.

228

### 229 **Step 3: study selection**

#### 230 *Inclusion criteria*

231 The proposed review will include articles that meet the following inclusion criteria:

- 232 • The article is written in English.
- 233 • The article is a peer-reviewed journal article, full conference proceeding, or research  
234 published on a commercially available digital technology which may be approved by a  
235 medical device regulatory body.
- 236 • Following the American Academy of Pediatrics' definition for late adolescence, more  
237 than the majority of data reported will include children aged >90 days post-natal to <21  
238 years old (50).
- 239 • The article is about an automated data-driven or knowledge-based approach toward  
240 paediatric sepsis prediction in a healthcare setting, including sepsis risk, severe sepsis,  
241 septic shock, or sepsis mortality risk.
- 242 • The digital technology is evaluated for its performance through validation testing,  
243 experiments, or an observational study.
- 244 • There is no specification for publication years.

245

#### 246 *Exclusion Criteria*

247 Screened articles that fit within the following categories will be excluded from this review:

248 Commentaries, dissertations, editorials, books and book chapters, lectures and addresses, study

1  
2  
3 249 protocols, review articles, and articles inaccessible for full-text review after utilizing library  
4  
5 250 resources. Articles that describe digital technologies informing sepsis treatment strategy  
6  
7  
8 251 selection are outside the scope of this review, because this study is focused on technologies  
9  
10 252 supporting clinical decision-making and screening that occurs before fluid resuscitation or  
11  
12 253 antibiotic selection for confirmed sepsis patients. Digital technologies developed for at-home use  
13  
14  
15 254 are also outside the scope of this review, as the context of the protocol is to review the evidence  
16  
17 255 on automated sepsis prediction technologies in regulated healthcare settings.  
18  
19  
20  
21

256

### 257 ***Selection process***

258 This review will follow the reporting checklist in the Preferred Reporting Items for Systematic  
259 reviews and Meta-Analyses extension for Scoping Reviews (PRISMA-ScR), provided by Tricco  
260 et al. (46). First, all relevant articles will be imported into Covidence. Second, two reviewers (RT  
261 and JG) will independently perform the title and abstract screening using the developed  
262 eligibility criteria by classifying them as “Yes,” “No,” or “Maybe.” Any article classified as  
263 “Yes” or “Maybe” by RT or JG will be included in the full-text review during this stage by  
264 adding them to an Excel spreadsheet for access by all authors. If a full-text article cannot be  
265 accessed, the reviewers will seek assistance from library services at the institution or directly  
266 contact the article’s corresponding author. Third, two investigators (RT and JG) will  
267 independently perform the full-text screening for eligibility using the listed inclusion-exclusion  
268 criteria. A third member of the research team will resolve any disagreements on eligibility that  
269 occur during the full-text review. After the full-text review, an inter-rater agreement will be  
270 calculated using Cohen’s kappa coefficient ( $\kappa$ ) statistic.

1  
2  
3 271 The first step in identifying relevant studies was performed on February 15, 2022. The  
4  
5 272 planned end date for completing the full-text screening and analysis is December 30<sup>th</sup>, 2022. We  
6  
7  
8 273 have maintained search alerts for potentially eligible articles to ensure our review remains  
9  
10 274 updated before dissemination through publication.  
11

12 275

#### 14 276 **Step 4: charting the data**

16  
17 277 The data extraction form will be developed in Covidence and exported to Excel to capture the  
18  
19 278 relevant information from each article. Two reviewers (RT, JG) will individually extract the  
20  
21 279 relevant data from a sample of eligible articles screened for inclusion in the full-text review to  
22  
23 280 ensure consistency of recording data. Any disagreements on extracted data will be resolved  
24  
25 281 through discussion between the reviewers. The form will be iteratively updated until the authors  
26  
27 282 reach a consensus on the relevant data to extract. We will begin by pulling the following type of  
28  
29  
30 283 data into the form, with additional data included as we screen more articles:

- 31  
32  
33 284 • Article information: author(s), year published, city, country, discipline(s).  
34  
35 285 • Prediction task: the definition of sepsis being identified and the use context for  
36  
37 286 recognition in paediatrics.  
38  
39  
40 287 • Prediction task type:  
41  
42 288 ○ Alerting automation that provides a notification that a patient has met the  
43  
44 289 objective sepsis recognition criteria.  
45  
46 290 ○ Decision support automation that provides assistance in the diagnosis of sepsis.  
47  
48 291 ○ Data automation that collects clinically relevant cues and information on behalf of  
49  
50 292 the user(s), which may be used in combination with alerting and decision support.  
51  
52  
53 293 • Prediction method:

- 294 ○ Data-driven methods that use retrospective datasets to build a statistical or
- 295 machine learning-based model.
- 296 ○ Knowledge-based methods that use consensus criteria to build an algorithm with
- 297 threshold-based criteria.
- 298 ● Participant demographics: age cohort, number of participants.
- 299 ● Prediction indicators: vital signs, biomarkers, socio-demographics, prior treatments,
- 300 medical history.
- 301 ● Prediction interface: audible alert, dialog box, provided information
- 302 ● Validation measures:
  - 303 ○ Reported number of true positives, false positives, and false negatives.
  - 304 ○ Reported sensitivity and specificity.
  - 305 ○ Time to accurate sepsis recognition by the technology and/or the clinician.
  - 306 ○ Measured or expected impact on clinical decisions and patient outcomes.
  - 307 ○ Generalizability of the digital technology in the context of bias, fairness, and
  - 308 appropriateness (51,52).

### 310 **Step 5: collating, summarizing, and reporting the results**

311 The extracted data will be synthesized within tables that summarize the current digital  
312 technology landscape in predicting paediatric sepsis, including characteristics that describe their  
313 performance and the sociotechnical factors of their integration by health care providers on  
314 patient outcomes. Within summary tables, we will present the current approaches toward model  
315 and algorithm development for automated sepsis prediction technologies, including the  
316 predictive indicators, the prediction timing objective, and how they interface with clinicians.

1  
2  
3 317 Quantitative performance and implementation measures such as sensitivity and specificity, and  
4  
5 318 the impacts on intervention timing will also be reported in data tables, including calculations of  
6  
7 319 precision, recall, and F1 score, when possible.  
8  
9

10 320 We will then perform a thematic analysis to identify concepts related to our research  
11  
12 321 questions. This analysis will be presented as a narrative, including an organization of themes on  
13  
14 322 the identified design characteristics of automated prediction technologies integrated within  
15  
16 323 clinical contexts. The purpose of the analysis will be to identify the types of research gaps that  
17  
18 324 exist for knowledge-based algorithms and data-driven models to improve sociotechnical  
19  
20 325 integration (i.e., supporting clinical decision-making) and patient outcomes. Challenges with  
21  
22 326 bias, fairness, and appropriateness will also be qualitatively examined with respect to potential  
23  
24 327 generalizability barriers. Diagrams will be developed for the identified relationships and themes  
25  
26 328 among the design characteristics of the automated technologies for paediatric sepsis prediction  
27  
28 329 and their influence on system performance and implementation throughout time to visually  
29  
30 330 highlight the opportunities for future investigations.  
31  
32  
33  
34

35 331

### 36 332 **Step 6: methodological quality appraisal**

37  
38 333 We will consult with experts in automated paediatric sepsis prediction technologies for this  
39  
40 334 review to identify those applied in clinical settings. While critical appraisal of the identified  
41  
42 335 articles is not mandatory in the scoping review methodology, we will consult with stakeholders  
43  
44 336 to inform and validate our findings.  
45  
46  
47  
48

49 337

### 50 338 **Patient and public involvement**

51  
52 339 There were no patients or public involvement in the development of this protocol.  
53  
54  
55  
56  
57  
58



340

**341 ETHICS AND DISSEMINATION**

342 Approval from an ethics review committee is not required for this study because it is a scoping  
343 review of previously published literature. Once the review is completed, we plan to disseminate  
344 the preliminary findings at national and international research conferences in global and digital  
345 health to gather critical feedback from researchers and the public. The finalized results from the  
346 review will be submitted for publication in an open access peer-reviewed journal.

347

**348 DISCUSSION**

349 This scoping review will provide a comprehensive and structured understanding of the  
350 automated digital technologies that have been developed to support the timely prediction of  
351 paediatric sepsis. At a high-level, the results will focus on design characteristics, performance  
352 validation, and current sociotechnical integration factors, which will be analyzed thematically  
353 and reported in data summary tables, indicating how the development of these technologies is  
354 evolving throughout time. It is anticipated that the outcomes will reveal the current challenges in  
355 developing and implementing clinically meaningful digital prediction technologies for paediatric  
356 sepsis across various clinical environments. Furthermore, the results are expected to identify  
357 critical research aspects requiring further investigation.

358 Compared to previous articles, this scoping review focuses on the complexities of  
359 paediatric sepsis, with a methodological strength in taking a comprehensive and systematic  
360 approach that will provide an overview of the evidence in this digital technology landscape.  
361 Inherent in the approach of a scoping review is the limitation of its objective: to summarize the  
362 literature and identify meaningful gaps for further research. As this study will include articles

1  
2  
3 363 with various study designs, it does not aim to answer specific questions about recommending the  
4  
5 364 use or application of certain sepsis prediction technologies for paediatrics. With the results of the  
6  
7 365 pilot search (Table 2), this review is also limited in its scope, where non-English articles or  
8  
9  
10 366 articles without a full-text version will not be included. Finally, digital technologies informing  
11  
12 367 treatment strategies for sepsis and studies looking at age cohorts <90 days post-natal or >21  
13  
14 368 years old will be excluded because of significant differences in sepsis etiology and clinical  
15  
16 369 presentation, while capturing literature from geographic areas that provide paediatric healthcare  
17  
18  
19 370 services to this age range. We plan to adequately convey the overall strengths and limitations  
20  
21 371 once the full-text review is completed, including any deviations from the protocol, in the final  
22  
23 372 review.

24  
25  
26 373 In conclusion, by mapping the attributes of paediatric sepsis prediction technologies to  
27  
28 374 outcomes related to clinical integration and performance, we anticipate that our results will  
29  
30 375 highlight critical research gaps among the medical, engineering, and computer science  
31  
32 376 disciplines. The results may inform research on identifying relevant predictive indicators best  
33  
34 377 suited for the design of digital technologies in specific use contexts and environments,  
35  
36 378 improvements towards model development for sepsis prediction, and factors supporting the  
37  
38 379 optimal workflow integration of digital prediction systems by clinicians. Ultimately, this review  
39  
40 380 will be critical for advancing knowledge to improve sepsis prediction for children globally.  
41  
42  
43  
44  
45 381

## 46 382 **List of abbreviations**

47 383 ACM: Association of Computing Machinery

48  
49 384 CINAHL: Cumulative Index to Nursing and Allied Health Literature

50  
51 385 IEEE: Institute of Electric and Electronic Engineers  
52  
53  
54  
55  
56  
57  
58  
59  
60

1  
2  
3 386 nSOFA: neonatal Sequential Organ Assessment Score  
4

5 387 PEWS: Paediatric Early Warning Score  
6

7  
8 388 PRISMA-P: Preferred Reporting Items for Systematic Review and Meta-Analysis extension for  
9  
10 389 protocols  
11

12 390 PRISMA-ScR: Preferred Reporting Items for Systematic Review and Meta-Analysis extension  
13  
14 391 for scoping reviews  
15

16  
17 392 pSOFA: paediatric Sequential Organ Assessment Score  
18

19 393 SOFA: Sequential Organ Assessment Score  
20

21 394 SPOT: Sepsis Prediction and Optimization Therapy  
22  
23

24 395

25  
26 396 **Author contributions**  
27

28 397 RT, JG, KM, CMB, and JMA contributed to the development of this manuscript. RT is the  
29

30  
31 398 guarantor of the review, conceptualized the research questions and methods, and drafted the  
32

33 399 initial manuscript. All authors contributed to the development of the search strategy, selection  
34

35 400 criteria, and data extraction template. JMA provided expertise on paediatric sepsis and search  
36

37 401 terms. All authors critically reviewed the protocol for intellectual content, subsequently revised it  
38

39  
40 402 for publication, and read and approved the final version for submission.  
41

42 403  
43

44 404 **Availability of data and materials**  
45

46  
47 405 Not applicable.  
48

49 406  
50

51 407 **Funding statement**  
52

53  
54 408 Not applicable.  
55  
56  
57  
58  
59  
60

1  
2  
3 409  
4

5 410 **Competing interests statement**  
6

7  
8 411 The authors declare that they have no competing interests.  
9

10 412  
11

12 413 **Acknowledgements**  
13

14 414 RT is supported by an Engineering Excellence Doctoral Fellowship from the University of  
15

16  
17 415 Waterloo Faculty of Engineering.  
18  
19  
20  
21  
22  
23  
24  
25  
26  
27  
28  
29  
30  
31  
32  
33  
34  
35  
36  
37  
38  
39  
40  
41  
42  
43  
44  
45  
46  
47  
48  
49  
50  
51  
52  
53  
54  
55  
56  
57  
58  
59  
60

## 416 **References**

- 417 1. Rudd KE, Johnson SC, Agesa KM, Shackelford KA, Tsoi D, Kievlan DR, et al. Global,  
418 regional, and national sepsis incidence and mortality, 1990–2017: analysis for the Global  
419 Burden of Disease Study. *The Lancet*. 2020 Jan;395(10219):200–11.
- 420 2. Carlton EF, Barbaro RP, Iwashyna T “Jack”, Prescott HC. Cost of Pediatric Severe Sepsis  
421 Hospitalizations. *JAMA Pediatr*. 2019 Oct 1;173(10):986.
- 422 3. World Health Organization. Global report on epidemiology and burden of sepsis: current  
423 evidence, identifying gaps and future directions [Internet]. Geneva; 2020 [cited 2022 Jan  
424 25]. Available from: <https://apps.who.int/iris/handle/10665/334216>
- 425 4. Emr BM, Alcamo AM, Carcillo JA, Aneja RK, Mollen KP. Pediatric Sepsis Update: How  
426 Are Children Different? *Surg Infect (Larchmt)*. 2018 Feb;19(2):176–83.
- 427 5. Aneja RK, Varughese-Aneja R, Vetterly CG, Carcillo JA. Antibiotic Therapy in Neonatal  
428 and Pediatric Septic Shock. *Curr Infect Dis Rep*. 2011 Oct 6;13(5):433–41.
- 429 6. Peshimam N, Nadel S. Sepsis in children: state-of-the-art treatment. *Ther Adv Infect Dis*.  
430 2021 Jan 23;8:204993612110553.
- 431 7. Davis AL, Carcillo JA, Aneja RK, Deymann AJ, Lin JC, Nguyen TC, et al. American  
432 College of Critical Care Medicine Clinical Practice Parameters for Hemodynamic Support  
433 of Pediatric and Neonatal Septic Shock. *Crit Care Med*. 2017 Jun;45(6):1061–93.
- 434 8. Peshimam N, Nadel S. Sepsis in children: state-of-the-art treatment. *Ther Adv Infect Dis*.  
435 2021 Jan 23;8:204993612110553.
- 436 9. Cox MI, Voss H. Improving sepsis recognition and management. *Curr Probl Pediatr  
437 Adolesc Health Care*. 2021 Apr;51(4):101001.

- 1  
2  
3 438 10. Cotten CM. Antibiotic Stewardship. *Clin Perinatol* [Internet]. 2015 Mar;42(1):195–206.  
4  
5 439 Available from: <https://linkinghub.elsevier.com/retrieve/pii/S009551081400116X>  
6  
7  
8 440 11. Lambert V, Matthews A, MacDonell R, Fitzsimons J. Paediatric early warning systems for  
9  
10 441 detecting and responding to clinical deterioration in children: a systematic review. *BMJ*  
11  
12 442 *Open*. 2017 Mar 13;7(3):e014497.  
13  
14  
15 443 12. Humoodi MO, Aldabbagh MA, Salem MM, al Talhi YM, Osman SM, Bakhsh M, et al.  
16  
17 444 Epidemiology of pediatric sepsis in the pediatric intensive care unit of king Abdulaziz  
18  
19 445 Medical City, Jeddah, Saudi Arabia. *BMC Pediatr*. 2021 Dec 7;21(1):222.  
20  
21  
22 446 13. Wynn JL, Polin RA. A neonatal sequential organ failure assessment score predicts  
23  
24 447 mortality to late-onset sepsis in preterm very low birth weight infants. *Pediatr Res*. 2020  
25  
26 448 Jul 1;88(1):85–90.  
27  
28  
29 449 14. Schlapbach LJ, Straney L, Bellomo R, MacLaren G, Pilcher D. Prognostic accuracy of  
30  
31 450 age-adapted SOFA, SIRS, PELOD-2, and qSOFA for in-hospital mortality among  
32  
33 451 children with suspected infection admitted to the intensive care unit. *Intensive Care Med*.  
34  
35 452 2018 Feb 19;44(2):179–88.  
36  
37  
38 453 15. Matics TJ, Sanchez-Pinto LN. Adaptation and Validation of a Pediatric Sequential Organ  
39  
40 454 Failure Assessment Score and Evaluation of the Sepsis-3 Definitions in Critically Ill  
41  
42 455 Children. *JAMA Pediatr*. 2017 Oct 2;171(10):e172352.  
43  
44  
45 456 16. Perlin JB, Jackson E, Hall C, Mindick A, Berberich G, Korwek K, et al. 2019 John M.  
46  
47 457 Eisenberg Patient Safety and Quality Awards: SPOTting Sepsis to Save Lives: A  
48  
49 458 Nationwide Computer Algorithm for Early Detection of Sepsis. *The Joint Commission*  
50  
51 459 *Journal on Quality and Patient Safety*. 2020 Jul;46(7):381–91.  
52  
53  
54  
55  
56  
57  
58  
59  
60

- 1  
2  
3 460 17. Ansermino JM, Wiens MO, Kissoon N. We need smarter trigger tools for diagnosing  
4  
5 461 sepsis in children in Canada. *Can Med Assoc J.* 2018 Sep 10;190(36):E1060–1.  
6  
7  
8 462 18. Yin J, Ngiam KY, Teo HH. Role of Artificial Intelligence Applications in Real-Life  
9  
10 463 Clinical Practice: Systematic Review. *J Med Internet Res.* 2021 Apr 22;23(4):e25759.  
11  
12 464 19. Persad E, Jost K, Honoré A, Forsberg D, Coste K, Olsson H, et al. Neonatal sepsis  
13  
14 465 prediction through clinical decision support algorithms: A systematic review. *Acta*  
15  
16 466 *Paediatr.* 2021 Dec 12;110(12):3201–26.  
17  
18  
19 467 20. Schinkel M, Paranjape K, Nannan Panday RS, Skyttberg N, Nanayakkara PWB. Clinical  
20  
21 468 applications of artificial intelligence in sepsis: A narrative review. *Comput Biol Med.*  
22  
23 469 2019 Dec;115:103488.  
24  
25  
26 470 21. Sundararajan S, Doctor A. Early recognition of neonatal sepsis using a bioinformatic vital  
27  
28 471 sign monitoring tool. *Pediatr Res.* 2021 Oct 29;  
29  
30  
31 472 22. Al-Shwaheen TI, Moghbel M, Hau YW, Ooi CY. Use of learning approaches to predict  
32  
33 473 clinical deterioration in patients based on various variables: a review of the literature. *Artif*  
34  
35 474 *Intell Rev.* 2021 Mar 13;  
36  
37  
38 475 23. Sahu P, Raj Stanly EA, Simon Lewis LE, Prabhu K, Rao M, Kunhikatta V. Prediction  
39  
40 476 modelling in the early detection of neonatal sepsis. *World Journal of Pediatrics.* 2022 Jan  
41  
42 477 5;  
43  
44  
45 478 24. Hassan N, Slight R, Weiland D, Vellinga A, Morgan G, Aboushareb F, et al. Preventing  
46  
47 479 sepsis; how can artificial intelligence inform the clinical decision-making process? A  
48  
49 480 systematic review. *Int J Med Inform.* 2021 Jun;150:104457.  
50  
51  
52  
53  
54  
55  
56  
57  
58  
59  
60

- 1  
2  
3 481 25. Muralitharan S, Nelson W, Di S, McGillion M, Devereaux P, Barr NG, et al. Machine  
4  
5 482 Learning–Based Early Warning Systems for Clinical Deterioration: Systematic Scoping  
6  
7 483 Review. *J Med Internet Res*. 2021 Feb 4;23(2):e25187.
- 8  
9  
10 484 26. Wu M, Du X, Gu R, Wei J. Artificial Intelligence for Clinical Decision Support in Sepsis.  
11  
12 485 *Front Med (Lausanne)*. 2021 May 13;8.
- 13  
14 486 27. S. Wheeler D. "Children are not Small Adults!". *Open Inflamm J*. 2011 Oct 7;4(1):4–15.
- 15  
16 487 28. Wulff A, Montag S, Marschollek M, Jack T. Clinical Decision-Support Systems for  
17  
18 488 Detection of Systemic Inflammatory Response Syndrome, Sepsis, and Septic Shock in  
19  
20 489 Critically Ill Patients: A Systematic Review. *Methods Inf Med*. 2019 Dec 9;58(S 02):e43–  
21  
22 490 57.
- 23  
24  
25 491 29. Peiffer-Smadja N, Rawson TM, Ahmad R, Buchard A, Georgiou P, Lescure FX, et al.  
26  
27 492 Machine learning for clinical decision support in infectious diseases: a narrative review of  
28  
29 493 current applications. *Clinical Microbiology and Infection*. 2020 May;26(5):584–95.
- 30  
31 494 30. Eisenberg MA, Balamuth F. Pediatric sepsis screening in US hospitals. *Pediatr Res*. 2021  
32  
33 495 Aug 20;
- 34  
35  
36 496 31. Teng AK, Wilcox AB. A Review of Predictive Analytics Solutions for Sepsis Patients.  
37  
38 497 *Appl Clin Inform*. 2020 May 27;11(03):387–98.
- 39  
40  
41 498 32. Ocampo-Quintero N, Vidal-Cortés P, del Río Carbajo L, Fdez-Riverola F, Reboiro-Jato  
42  
43 499 M, Glez-Peña D. Enhancing sepsis management through machine learning techniques: A  
44  
45 500 review. *Med Intensiva*. 2020 May;
- 46  
47  
48 501 33. Eisenberg MA, Balamuth F. Pediatric sepsis screening in US hospitals. *Pediatr Res*. 2021  
49  
50 502 Aug 20;
- 51  
52  
53  
54  
55  
56  
57  
58  
59  
60



- 1  
2  
3 503 34. Fernandes M, Vieira SM, Leite F, Palos C, Finkelstein S, Sousa JMC. Clinical Decision  
4  
5 504 Support Systems for Triage in the Emergency Department using Intelligent Systems: a  
6  
7 505 Review. *Artif Intell Med.* 2020 Jan;102:101762.
- 8  
9  
10 506 35. Fleuren LM, Klausch TLT, Zwager CL, Schoonmade LJ, Guo T, Roggeveen LF, et al.  
11  
12 507 Machine learning for the prediction of sepsis: a systematic review and meta-analysis of  
13  
14 508 diagnostic test accuracy. *Intensive Care Med.* 2020 Mar 21;46(3):383–400.
- 15  
16  
17 509 36. Makam AN, Nguyen OK, Auerbach AD. Diagnostic accuracy and effectiveness of  
18  
19 510 automated electronic sepsis alert systems: A systematic review. *J Hosp Med.* 2015  
20  
21 511 Jun;10(6):396–402.
- 22  
23  
24 512 37. Smyth MA, Brace-McDonnell SJ, Perkins GD. Identification of adults with sepsis in the  
25  
26 513 prehospital environment: a systematic review. *BMJ Open.* 2016 Aug 5;6(8):e011218.
- 27  
28  
29 514 38. Despins LA. Automated Detection of Sepsis Using Electronic Medical Record Data: A  
30  
31 515 Systematic Review. *Journal for Healthcare Quality.* 2017 Nov;39(6):322–33.
- 32  
33  
34 516 39. Li L, Ackermann K, Baker J, Westbrook J. Use and Evaluation of Computerized Clinical  
35  
36 517 Decision Support Systems for Early Detection of Sepsis in Hospitals: Protocol for a  
37  
38 518 Scoping Review. *JMIR Res Protoc.* 2020 Nov 20;9(11):e24899.
- 39  
40 519 40. Patton L, Young V. Effectiveness of provider strategies for the early recognition of  
41  
42 520 clinical deterioration due to sepsis in pediatric patients. *JBI Database System Rev*  
43  
44 521 *Implement Rep.* 2017 Jan;15(1):76–85.
- 45  
46  
47 522 41. Pepic I, Feldt R, Ljungström L, Torkar R, Dalevi D, Maurin Söderholm H, et al. Early  
48  
49 523 detection of sepsis using artificial intelligence: a scoping review protocol. *Syst Rev.* 2021  
50  
51 524 Dec 16;10(1):28.

- 1  
2  
3 525 42. Chapman SM, Wray J, Oulton K, Peters MJ. Systematic review of paediatric track and  
4  
5 526 trigger systems for hospitalised children. *Resuscitation*. 2016 Dec;109:87–109.
- 6  
7 527 43. Trubey R, Huang C, Lugg-Widger F v, Hood K, Allen D, Edwards D, et al. Validity and  
8  
9 528 effectiveness of paediatric early warning systems and track and trigger tools for  
10  
11 529 identifying and reducing clinical deterioration in hospitalised children: a systematic  
12  
13 530 review. *BMJ Open*. 2019 May 5;9(5):e022105.
- 14  
15 531 44. Arksey H, O'Malley L. Scoping studies: towards a methodological framework. *Int J Soc*  
16  
17 532 *Res Methodol*. 2005 Feb;8(1):19–32.
- 18  
19 533 45. Levac D, Colquhoun H, O'Brien KK. Scoping studies: advancing the methodology.  
20  
21 534 *Implementation Science*. 2010 Dec 20;5(1):69.
- 22  
23 535 46. Tricco AC, Lillie E, Zarin W, O'Brien KK, Colquhoun H, Levac D, et al. PRISMA  
24  
25 536 Extension for Scoping Reviews (PRISMA-ScR): Checklist and Explanation. *Ann Intern*  
26  
27 537 *Med*. 2018 Oct 2;169(7):467–73.
- 28  
29 538 47. Moher D, Shamseer L, Clarke M, Ghersi D, Liberati A, Petticrew M, et al. Preferred  
30  
31 539 reporting items for systematic review and meta-analysis protocols (PRISMA-P) 2015  
32  
33 540 statement. *Syst Rev*. 2015 Dec 1;4(1):1.
- 34  
35 541 48. Peters MDJ, Godfrey C, McInerney P, Khalil H, Larsen P, Marnie C, et al. Best practice  
36  
37 542 guidance and reporting items for the development of scoping review protocols. *JB Evid*  
38  
39 543 *Synth*. 2022 Apr;20(4):953–68.
- 40  
41 544 49. Wohlin C. Guidelines for snowballing in systematic literature studies and a replication in  
42  
43 545 software engineering. In: *Proceedings of the 18th International Conference on Evaluation*  
44  
45 546 *and Assessment in Software Engineering - EASE '14*. New York, New York, USA: ACM  
46  
47 547 Press; 2014. p. 1–10.
- 48  
49  
50  
51  
52  
53  
54  
55  
56  
57  
58  
59  
60

- 1  
2  
3 548 50. Hagan JF, Shaw JS, Duncan PM. Bright futures. American Academy of Pediatrics; 2017.  
4  
5 549 51. Fletcher RR, Nakeshimana A, Olubeko O. Addressing Fairness, Bias, and Appropriate  
6  
7 Use of Artificial Intelligence and Machine Learning in Global Health. Front Artif Intell.  
8 550  
9  
10 551 2021 Apr 15;3.  
11  
12 552 52. Pot M, Kieusseyan N, Prainsack B. Not all biases are bad: equitable and inequitable biases  
13  
14 in machine learning and radiology. Insights Imaging. 2021 Dec 10;12(1):13.  
15 553  
16  
17 554

## PRISMA-P 2015 Checklist

This checklist has been adapted for use with systematic review protocol submissions to BioMed Central journals from Table 3 in Moher D et al: Preferred reporting items for systematic review and meta-analysis protocols (PRISMA-P) 2015 statement. *Systematic Reviews* 2015 4:1

An Editorial from the Editors-in-Chief of *Systematic Reviews* details why this checklist was adapted - Moher D, Stewart L & Shekelle P: Implementing PRISMA-P: recommendations for prospective authors. *Systematic Reviews* 2016 5:15

| Section/topic                     | #  | Checklist item                                                                                                                                                                                  | Information reported                |                                     | Line number(s) |
|-----------------------------------|----|-------------------------------------------------------------------------------------------------------------------------------------------------------------------------------------------------|-------------------------------------|-------------------------------------|----------------|
|                                   |    |                                                                                                                                                                                                 | Yes                                 | No                                  |                |
| <b>ADMINISTRATIVE INFORMATION</b> |    |                                                                                                                                                                                                 |                                     |                                     |                |
| <b>Title</b>                      |    |                                                                                                                                                                                                 |                                     |                                     |                |
| Identification                    | 1a | Identify the report as a protocol of a systematic review                                                                                                                                        | <input checked="" type="checkbox"/> | <input type="checkbox"/>            | 1              |
| Update                            | 1b | If the protocol is for an update of a previous systematic review, identify as such                                                                                                              | <input type="checkbox"/>            | <input checked="" type="checkbox"/> | N/A            |
| <b>Registration</b>               | 2  | If registered, provide the name of the registry (e.g., PROSPERO) and registration number in the Abstract                                                                                        | <input checked="" type="checkbox"/> | <input type="checkbox"/>            | 62, 180        |
| <b>Authors</b>                    |    |                                                                                                                                                                                                 |                                     |                                     |                |
| Contact                           | 3a | Provide name, institutional affiliation, and e-mail address of all protocol authors; provide physical mailing address of corresponding author                                                   | <input checked="" type="checkbox"/> | <input type="checkbox"/>            | 4-29           |
| Contributions                     | 3b | Describe contributions of protocol authors and identify the guarantor of the review                                                                                                             | <input checked="" type="checkbox"/> | <input type="checkbox"/>            | 396-401        |
| <b>Amendments</b>                 | 4  | If the protocol represents an amendment of a previously completed or published protocol, identify as such and list changes; otherwise, state plan for documenting important protocol amendments | <input type="checkbox"/>            | <input checked="" type="checkbox"/> | N/A            |
| <b>Support</b>                    |    |                                                                                                                                                                                                 |                                     |                                     |                |
| Sources                           | 5a | Indicate sources of financial or other support for the review                                                                                                                                   | <input checked="" type="checkbox"/> | <input type="checkbox"/>            | 414-415        |
| Sponsor                           | 5b | Provide name for the review funder and/or sponsor                                                                                                                                               | <input checked="" type="checkbox"/> | <input type="checkbox"/>            | 408, 414-415   |
| Role of sponsor/funder            | 5c | Describe roles of funder(s), sponsor(s), and/or institution(s), if any, in developing the protocol                                                                                              | <input checked="" type="checkbox"/> | <input type="checkbox"/>            | 408, 414-415   |
| <b>INTRODUCTION</b>               |    |                                                                                                                                                                                                 |                                     |                                     |                |
| <b>Rationale</b>                  | 6  | Describe the rationale for the review in the context of what is already known                                                                                                                   | <input checked="" type="checkbox"/> | <input type="checkbox"/>            | 87-164         |

| Section/topic                             | #   | Checklist item                                                                                                                                                                                                                              | Information reported                |                                     | Line number(s)   |
|-------------------------------------------|-----|---------------------------------------------------------------------------------------------------------------------------------------------------------------------------------------------------------------------------------------------|-------------------------------------|-------------------------------------|------------------|
|                                           |     |                                                                                                                                                                                                                                             | Yes                                 | No                                  |                  |
| <b>Objectives</b>                         | 7   | Provide an explicit statement of the question(s) the review will address with reference to participants, interventions, comparators, and outcomes (PICO)                                                                                    | <input checked="" type="checkbox"/> | <input type="checkbox"/>            | 183-198          |
| <b>METHODS</b>                            |     |                                                                                                                                                                                                                                             |                                     |                                     |                  |
| <b>Eligibility criteria</b>               | 8   | Specify the study characteristics (e.g., PICO, study design, setting, time frame) and report characteristics (e.g., years considered, language, publication status) to be used as criteria for eligibility for the review                   | <input checked="" type="checkbox"/> | <input type="checkbox"/>            | 230-255          |
| <b>Information sources</b>                | 9   | Describe all intended information sources (e.g., electronic databases, contact with study authors, trial registers, or other grey literature sources) with planned dates of coverage                                                        | <input checked="" type="checkbox"/> | <input type="checkbox"/>            | 201-211          |
| <b>Search strategy</b>                    | 10  | Present draft of search strategy to be used for at least one electronic database, including planned limits, such that it could be repeated                                                                                                  | <input checked="" type="checkbox"/> | <input type="checkbox"/>            | 218-219, 231-255 |
| <b>STUDY RECORDS</b>                      |     |                                                                                                                                                                                                                                             |                                     |                                     |                  |
| Data management                           | 11a | Describe the mechanism(s) that will be used to manage records and data throughout the review                                                                                                                                                | <input checked="" type="checkbox"/> | <input type="checkbox"/>            | 220-227, 260-264 |
| Selection process                         | 11b | State the process that will be used for selecting studies (e.g., two independent reviewers) through each phase of the review (i.e., screening, eligibility, and inclusion in meta-analysis)                                                 | <input checked="" type="checkbox"/> | <input type="checkbox"/>            | 260-274          |
| Data collection process                   | 11c | Describe planned method of extracting data from reports (e.g., piloting forms, done independently, in duplicate), any processes for obtaining and confirming data from investigators                                                        | <input checked="" type="checkbox"/> | <input type="checkbox"/>            | 220-227, 231-255 |
| <b>Data items</b>                         | 12  | List and define all variables for which data will be sought (e.g., PICO items, funding sources), any pre-planned data assumptions and simplifications                                                                                       | <input checked="" type="checkbox"/> | <input type="checkbox"/>            | 277-308          |
| <b>Outcomes and prioritization</b>        | 13  | List and define all outcomes for which data will be sought, including prioritization of main and additional outcomes, with rationale                                                                                                        | <input type="checkbox"/>            | <input checked="" type="checkbox"/> | N/A              |
| <b>Risk of bias in individual studies</b> | 14  | Describe anticipated methods for assessing risk of bias of individual studies, including whether this will be done at the outcome or study level, or both; state how this information will be used in data synthesis                        | <input type="checkbox"/>            | <input checked="" type="checkbox"/> | N/A              |
| <b>DATA</b>                               |     |                                                                                                                                                                                                                                             |                                     |                                     |                  |
| <b>Synthesis</b>                          | 15a | Describe criteria under which study data will be quantitatively synthesized                                                                                                                                                                 | <input checked="" type="checkbox"/> | <input type="checkbox"/>            | 311-319          |
|                                           | 15b | If data are appropriate for quantitative synthesis, describe planned summary measures, methods of handling data, and methods of combining data from studies, including any planned exploration of consistency (e.g., $I^2$ , Kendall's tau) | <input type="checkbox"/>            | <input checked="" type="checkbox"/> | N/A              |

| Section/topic                            | #   | Checklist item                                                                                                              | Information reported                |                                     | Line number(s) |
|------------------------------------------|-----|-----------------------------------------------------------------------------------------------------------------------------|-------------------------------------|-------------------------------------|----------------|
|                                          |     |                                                                                                                             | Yes                                 | No                                  |                |
|                                          | 15c | Describe any proposed additional analyses (e.g., sensitivity or subgroup analyses, meta-regression)                         | <input type="checkbox"/>            | <input checked="" type="checkbox"/> | N/A            |
|                                          | 15d | If quantitative synthesis is not appropriate, describe the type of summary planned                                          | <input checked="" type="checkbox"/> | <input type="checkbox"/>            | 320-330        |
| <b>Meta-bias(es)</b>                     | 16  | Specify any planned assessment of meta-bias(es) (e.g., publication bias across studies, selective reporting within studies) | <input type="checkbox"/>            | <input checked="" type="checkbox"/> | N/A            |
| <b>Confidence in cumulative evidence</b> | 17  | Describe how the strength of the body of evidence will be assessed (e.g., GRADE)                                            | <input checked="" type="checkbox"/> | <input type="checkbox"/>            | 333-336        |
